# Supplementary material for: Changes in hypertension prevalence, awareness, treatment and control rates over 20 years in National Capital Region of India: results from a repeat cross-sectional study
Source: PubMed Central journal article supplement — BMJ Open. 2017 Jul 12;7(7):e015639. doi: 10.1136/bmjopen-2016-015639 (PMC5734355; doi:10.1136/bmjopen-2016-015639), 2017-07-12
Supplement: bmjopen-2016-015639.draft_revisions.pdf [file bmjopen-2016-015639.draft_revisions.pdf]

# BMJ Open

## Changes in Hypertension Prevalence, Awareness, Treatment and Control Rates Over Twenty Years in National Capital Region of India

|                                 |                                                                                                                                                                                                                                                                                                                                                                                                                                                                                                                                                                                                                                                                                                                                                                                                                                                                                                                      |
|---------------------------------|----------------------------------------------------------------------------------------------------------------------------------------------------------------------------------------------------------------------------------------------------------------------------------------------------------------------------------------------------------------------------------------------------------------------------------------------------------------------------------------------------------------------------------------------------------------------------------------------------------------------------------------------------------------------------------------------------------------------------------------------------------------------------------------------------------------------------------------------------------------------------------------------------------------------|
| Journal:                        | <i>BMJ Open</i>                                                                                                                                                                                                                                                                                                                                                                                                                                                                                                                                                                                                                                                                                                                                                                                                                                                                                                      |
| Manuscript ID                   | bmjopen-2016-015639                                                                                                                                                                                                                                                                                                                                                                                                                                                                                                                                                                                                                                                                                                                                                                                                                                                                                                  |
| Article Type:                   | Research                                                                                                                                                                                                                                                                                                                                                                                                                                                                                                                                                                                                                                                                                                                                                                                                                                                                                                             |
| Date Submitted by the Author:   | 26-Dec-2016                                                                                                                                                                                                                                                                                                                                                                                                                                                                                                                                                                                                                                                                                                                                                                                                                                                                                                          |
| Complete List of Authors:       | Roy, Ambuj; All India Institute of Medical Sciences, Cardiology<br>Praveen , Pradeep A; All India Institute of Medical Sciences, Endocrinology and Metabolism<br>Amarchand, Ritvik; All India Institute of Medical Sciences, Ramakrishnan, Lakshmy; All India Institute of Medical Sciences, Cardiac Biochemistry<br>Gupta, Ruby; Public Health Foundation of India<br>Kondal, Dimple; Public Health Foundation of India<br>Singh, Kalpana; Public Health Foundation of India<br>Sharma , Meenakshi; Indian Council of Medical Research<br>Shukla, DK; Indian Council Of Medical Research, Non-communicable Diseases<br>Tandon, Nikhil; All India Institute of Medical Sciences, Endocrinology and Metabolism<br>Reddy, KS; Public Health Foundation of India<br>Anand, Krishnan; All India Institute of Medical Sciences, Center for Community Medicine<br>Prabhakaran, Dorairaj; Public Health Foundation of India |
| <b>Primary Subject Heading</b>: | Cardiovascular medicine                                                                                                                                                                                                                                                                                                                                                                                                                                                                                                                                                                                                                                                                                                                                                                                                                                                                                              |
| Secondary Subject Heading:      | Epidemiology                                                                                                                                                                                                                                                                                                                                                                                                                                                                                                                                                                                                                                                                                                                                                                                                                                                                                                         |
| Keywords:                       | Hypertension < CARDIOLOGY, Pre Hypertension, Cardiovascular disease risk factors, Secular trends, India                                                                                                                                                                                                                                                                                                                                                                                                                                                                                                                                                                                                                                                                                                                                                                                                              |
|                                 |                                                                                                                                                                                                                                                                                                                                                                                                                                                                                                                                                                                                                                                                                                                                                                                                                                                                                                                      |

SCHOLARONE™  
Manuscripts

**Title:** Changes in Hypertension Prevalence, Awareness, Treatment and Control Rates Over Twenty Years in National Capital Region of India

**Sub Title:** Change in hypertension burden over 20 years-India

**List of Authors and Affiliations**

Ambuj Roy, MD, DM\*

Professor of Cardiology, All India Institute of Medical Sciences, New Delhi, India,

Email: [drambujroy@gmail.com](mailto:drambujroy@gmail.com)

Pradeep A Praveen, MPH

Doctoral Student, Department of Endocrinology and Metabolism,

All India Institute of Medical Sciences, New Delhi, India, Email: [praveen.aims@gmail.com](mailto:praveen.aims@gmail.com)

Ritvik Amarchand, MBBS, PhD

Centre for Community Medicine, All India Institute of Medical Sciences, New Delhi, India,

Email: [drritvik@gmail.com](mailto:drritvik@gmail.com)

Lakshmy Ramakrishnan, PhD

Professor, Department of Cardiac Biochemistry, All India Institute of Medical Sciences, New Delhi,

India, Email: [lakshmy\\_ram@yahoo.com](mailto:lakshmy_ram@yahoo.com)

Ruby Gupta, PhD

Scientific Officer (Biochemistry), Public Health Foundation of India, Gurgaon, India,

Email: [ruby.gupta@phfi.org](mailto:ruby.gupta@phfi.org)

Dimple Kondal, PhD

Statistician, Public Health Foundation of India, Gurgaon, India, Email: [dimple@ccdcindia.org](mailto:dimple@ccdcindia.org)

Kalpana Singh, MSc

Statistician, Public Health Foundation of India, Gurgaon, India, Email: [kalpana.sing@phfi.org](mailto:kalpana.sing@phfi.org)

Meenakshi Sharma, PhD

Scientist E, Indian Council of Medical Research, New Delhi, India, Email: [smeenakshi@hotmail.com](mailto:smeenakshi@hotmail.com)

Deepak Kumar Shukla, PhD

Scientist G & Head, Division of Non Communicable Diseases, Indian Council of Medical Research,

New Delhi, India, Email: [shukladk@icmr.org.in](mailto:shukladk@icmr.org.in)

Nikhil Tandon, MD, PhD

Professor & Head, Department of Endocrinology and Metabolism, All India Institute of Medical

Sciences, New Delhi, India, Email: [nikhil\\_tandon@hotmail.com](mailto:nikhil_tandon@hotmail.com)

Kolli Srinath Reddy, MD, DM, MSc

President, Public Health Foundation of India, Gurgaon, India, Email: [ksrinath.reddy@phfi.org](mailto:ksrinath.reddy@phfi.org)

Anand Krishnan, MD, PhD

Professor, Centre for Community Medicine, All India Institute of Medical Sciences, New Delhi, India,

Email: [kanandiyer@yahoo.com](mailto:kanandiyer@yahoo.com)

1  
2  
3 Dorairaj Prabhakaran, MD, DM, MSc  
4 Professor & Vice President, Public Health Foundation of India, Gurgaon, India,  
5 Email: [dprabhakaran@ccdcindia.org](mailto:dprabhakaran@ccdcindia.org)  
6

7 \*Corresponding Author  
8

9 **Address for correspondence:**

10  
11 Ambuj Roy, MD, DM  
12 Additional Professor of Cardiology,  
13 All India Institute of Medical Sciences  
14 New Delhi, India- 110029.  
15 Email: [drambujroy@gmail.com](mailto:drambujroy@gmail.com)  
16 Phone: 91-9869393945;  
17 Fax: 91-11-26588663  
18  
19

20 Word count: 2707  
21

22 **Competing Interests:** Nothing to declare  
23

24  
25 **Funding:** The study was funded by the Indian Council of Medical Research, New Delhi, India  
26  
27

28 **Contributorship Statement:**  
29

30  
31 Authors Reddy, Tandon, Prabhakaran, Anand Krishnan, Shukla, Sharma and Roy conceptualized and  
32 designed the study and revised the manuscript. Reddy, Prabhakaran, Anand Krishnan, Praveen,  
33 Amarchand and Roy were involved in execution of the study in the field. Praveen, Prabhakaran and  
34 Roy drafted and revised the manuscript. Kondal and Singh did the data analysis. Lakshmy and Gupta  
35 coordinated the biochemical analysis and interpreted the data  
36  
37  
38  
39  
40  
41  
42

43 **Data Sharing Statement:**  
44

45  
46 I, the corresponding author of the manuscript, on behalf of all the other authors here by agree to  
47  
48 share the study data and additional explanatory materials to fellow researchers.  
49  
50

51 **Key Words:** Hypertension; Pre-Hypertension; Secular trends; Cardiovascular disease risk factors;  
52 India  
53  
54  
55  
56  
57  
58  
59  
60

**Abstract**

**Background & Objectives:** Despite being one of the leading risk factors of cardiovascular mortality, there is limited data on changes in hypertension burden and management from India. This study evaluates trend in the prevalence, awareness, treatment and control of hypertension in the urban and rural areas of India's National Capital Region (NCR).

**Design & setting:** Two representative cross-sectional surveys were conducted in urban and rural areas [Survey1 (1991-1994); Survey 2 (2010-2012)] of NCR using similar methodologies.

**Participants:** A total of 3,048 (mean age: 46.8± 9.0; 52.3 % women) and 2,052 (mean age: 46.5±8.4; 54.2 % women) subjects of urban areas and 2,487 (mean age: 46.6±8.8; 57.0% women) and 1,917 (mean age: 46.5±8.5; 51.3 % women) subjects of rural areas were included in Survey 1 & 2 respectively.

**Primary and secondary outcome measures:** Hypertension was defined as per Joint National Committee VII guidelines. Structure questionnaire was used to measure the awareness and treatment status of hypertension. A mean SBP < 140 mm Hg and DBP < 90 mm Hg was defined as control of hypertension among the participants with hypertension.

**Results:** The age and sex standardised prevalence of hypertension increased from 23.0% to 42.2% ( $p<0.001$ ) and 11.2% to 28.9% ( $p<0.001$ ) urban and rural NCR respectively. In both surveys, those with high education, alcohol use, obesity and high fasting blood glucose were at a higher risk for hypertension. However, the change in hypertension prevalence between the surveys was independent of these risk factors [adjusted odds ratio (95% C.I): urban [2.4 (2.1, 2.7)]; rural [3.3 (2.5, 4.3)]. Overall there was no improvement in awareness, treatment and control rates of hypertension in the population.

1  
2  
3 **Conclusion:** There was marked increase in prevalence of hypertension over two decades with no  
4  
5 improvement in management.  
6  
7

#### 8 **Strengths of the study**

- 9  
10  
11 • One of the first studies to report the trends in the population burden and management of  
12 hypertension from the low and middle income countries
- 13  
14  
15 • The study surveyed representative samples from the same population using similar  
16  
17 methodologies and was adequately powered to compare hypertension burden at two time  
18  
19 periods  
20  
21

#### 22 **Limitations of the study**

- 23  
24  
25 • The Instrument used for blood pressure measurement was different in the two studies. This  
26  
27 was inevitable since the apparatus used in first survey was unavailable at the time of the  
28  
29 next survey.  
30  
31
- 32  
33  
34 • Behavioural risk factors like diet and physical activity were not assessed during the first  
35  
36 survey and therefore not reported and they could account for difference in blood pressure  
37  
38 levels as discussed.  
39  
40
- 41  
42  
43 • The study being restricted to urban and rural NCR of Delhi, may not be generalizable across  
44  
45 India.  
46  
47  
48  
49  
50  
51  
52  
53  
54  
55  
56  
57  
58  
59  
60

## Introduction

High blood pressure (HBP) is the single largest risk factor for disease burden worldwide<sup>1</sup>. In India, HBP has now emerged as a leading risk factor for mortality[1]. Several studies over the years have shown increasing prevalence of hypertension in India[2–4]. Kearney et al in their paper predicted that the burden of hypertension in India is expected to almost double from 118 million in 2000 to 213.5 million by 2025[5]. A recent systematic analysis suggested high prevalence with poor awareness, treatment and control of hypertension in India[6].

At the population level the effect of rise in blood pressure is continuous with increasing cardiovascular risk with rise of blood pressure above 115/75 mmHg. However, data from India on trends of population blood pressure distribution, hypertension prevalence, awareness, treatment and control in representative population over time is scarce due to absence of active surveillance. This data is important to formulate informed policy as high blood pressure is one of the key targets to reduce premature mortality due to cardiovascular diseases (CVD) set by World Health Organisation (WHO) and the Indian government[7,8].

We conducted two surveys on prevalence of cardiovascular risk factors between April 1991 and June 1994 (Survey 1) and August 2010 and January 2012 (Survey 2) in National Capital Region (NCR) of India (urban Delhi and adjoining rural Haryana). These surveys enabled us to estimate the changes in blood pressure epidemiology in this population over this time period.

## Methods

The two cross-sectional surveys were carried out in adults aged 35-64 years using a multistage cluster random sampling method in the urban area and a simple random sampling method in the rural area to assess the prevalence of coronary artery disease (CAD) and its risk factors. The sample size was calculated based on estimated prevalence of CAD in the population. The details of sample size calculation were published elsewhere [9]. Based on this 5535 participants were recruited for

1  
2  
3 survey 1(urban-3048; rural-2487) and 3969 were recruited for survey 2 (urban-2052; rural-1917). In  
4  
5 both surveys, all eligible individuals from the primary sampling unit (household) were approached  
6  
7 for their consent to participate in the survey. 99% of the participants in both surveys had their blood  
8  
9 pressure measured. Among those surveyed, 95% and 78% in Survey 1 and Survey 2 respectively of  
10  
11 the urban sample and 51.0% and 64.9% in Survey 1 and Survey 2 respectively of the rural sample  
12  
13 agreed to provide a fasting blood sample for biochemical analysis. Both the surveys got ethical  
14  
15 clearance from institutional ethics committees of the participating institutions. The data were  
16  
17 collected through household visits using a standardized questionnaire. Anthropometric and  
18  
19 biochemical data were collected through physician led medical camps using standardized  
20  
21 equipments and methods. In survey 1, blood pressure was measured using a random zero  
22  
23 sphygmomanometer while in survey 2 an automated blood pressure machine [OMRON (HEM-7080)]  
24  
25 was used. In both surveys, two blood pressure readings were recorded in sitting position, five  
26  
27 minutes apart. If the difference between the two readings was more than 10mmHg, a third  
28  
29 measurement was taken. The mean of the last two measurements were taken for final analysis. Pre  
30  
31 hypertension and hypertension were defined using the Joint National Committee VII criteria[10]  
32  
33 (systolic blood pressure (SBP) 120-139 mm Hg and/or diastolic blood pressure (DBP) 80-89 mm Hg  
34  
35 for pre hypertension and SBP $\geq$  140 mm Hg and/or DBP  $\geq$  90 mm Hg or on blood pressure lowering  
36  
37 medication for hypertension). Those who were diagnosed with hypertension were further classified  
38  
39 in to stage I (SBP140-159 mm Hg and/or DBP 90-99 mm Hg) and stage II (SBP $\geq$  160 mm Hg and/or  
40  
41 DBP  $\geq$  100mm Hg).  
42  
43  
44  
45  
46

47 Hypertension awareness, treatment, and control were analysed in hypertensive participants based  
48  
49 on questionnaires and blood pressure measurements. Among the hypertensive participants, self-  
50  
51 report of any previous clinical diagnosis of hypertension was defined as awareness of hypertension.  
52  
53 Self- reported anti-hypertension medication use was defined as on treatment and a mean SBP < 140  
54  
55  
56  
57  
58  
59  
60

1  
2  
3 mm Hg and DBP < 90 mm Hg was defined as control of hypertension among the participants with  
4  
5 hypertension.  
6  
7

### 8 **Statistical analysis**

9

10 STATA 12.1 (STATA Corporation, College Station, TX, USA) was used for the statistical analysis.  
11  
12 Prevalence of hypertension along with their standard errors and ratios between Survey 1 and Survey  
13  
14 2 and the awareness, treatment and control levels during Survey 1 and 2 are presented. The age and  
15  
16 gender adjusted prevalence of hypertension was calculated using Indian census data for 2011 as  
17  
18 standard population. Hypertension prevalence was analysed by selected demographic and health  
19  
20 characteristics: gender, place of residence (urban/rural), age category (35-44, 45-54, 55-64),  
21  
22 educational status, Body Mass Index (BMI), blood glucose level and alcohol use. Educational status  
23  
24 was defined as follows: Low (illiterate to primary level), Medium (middle to high school) High (higher  
25  
26 secondary and above). South Asian cut offs[11] were used to categorise BMI values (normal- BMI<23  
27  
28 kg/m<sup>2</sup>, overweight- BMI 23-28 kg/m<sup>2</sup>, obesity-BMI≥28 kg/m<sup>2</sup>). Blood glucose levels were categorised  
29  
30 as normoglycemic (fasting plasma glucose (FPG) < 100 mg/dl), impaired fasting glucose (FPG 100-  
31  
32 <126mg/dl); and diabetes (FPG≥ 126 mg/dl). Alcohol use was defined as any use in the last twelve  
33  
34 months of any alcohol product. The difference in proportions between the surveys was evaluated  
35  
36 using chi square test. Any p value <0.05 was considered statistically significant. Multivariate logistic  
37  
38 regression models were used to examine the effect of potential predictors including gender, age  
39  
40 groups, obesity, diabetes and alcohol use on the increase in hypertension prevalence between the  
41  
42 surveys. Logistic regression model were constructed for urban and rural populations separately and  
43  
44 adjusted odds ratios with 95% confidence intervals (C.I) are presented. Each model has age, gender,  
45  
46 obesity, diabetes, alcohol use and time period (Survey1 vs Survey 2) as binary independent variables;  
47  
48 and hypertension as a binary dependent variable.  
49  
50  
51  
52  
53  
54  
55  
56  
57  
58  
59  
60



## Results

A total of 3,048 (mean (SD) age: 46.8 (9.0) years; 52.3 % females) and 2,052 (mean (SD) age: 46.5 (8.4) years; 54.2 % females) subjects of urban areas and 2,487 (mean (SD) age: 46.6 (8.8) years; 57.0 % females) and 1,917 (mean (SD) age: 46.5 (8.5) years; 51.3 % females) subjects of rural areas were recruited in Survey 1 & 2 respectively.

The prevalence of hypertension increased from 23.0% to 42.2% and 11.2% to 28.9% in urban and rural NCR of Delhi respectively between the two surveys. The increase in prevalence was by 83% in urban NCR and 158% in rural NCR. The rise in prevalence was more in men with a rise of 94% and 73% in urban areas and 191% and 125% in rural areas in men and women respectively (Table 1). The age specific prevalence of hypertension revealed an increase in prevalence at all ages except in the highest age group (55-64 years) of urban men and women. The rise in age specific prevalence was highest in the youngest age group (35-44) with a rise in prevalence of 153%, 115%, 239% and 336%, in urban men, urban women, rural men and rural women respectively.

The distribution of blood pressure in the population (excluding those on anti-hypertensive therapy), changed significantly over the years. In survey 2, there was lesser proportion of the people with optimum blood pressure values (BP <120/80mmhg) and a higher proportion of individuals with pre-hypertension, Stage I and Stage II hypertension (Figure 1) compared to survey 1. This change of distribution was similar across men and women in NCR and also both in urban and rural areas.

The prevalence of hypertension was stratified by other known risk factors associated with blood pressure (Figure 2). Hypertension prevalence increased with increasing BMI and education categories in both urban and rural population (Figure 2). The prevalence was highest in diabetics followed by those with impaired fasting blood glucose in both urban and rural areas (Figure 2). Alcohol users had higher prevalence of hypertension (Figure 2). The prevalence increased in each of these categories in survey 2 as compared to Survey 1. This was further evaluated by statistical

1  
2  
3 modelling (Table 2). The relative increase in hypertension prevalence between the surveys was  
4  
5 modelled as if there was no change in the age, gender, obesity, diabetes and alcohol use between  
6  
7 the surveys. However the increased odds ratio of hypertension in Survey 2 as compared to Survey 1  
8  
9 persisted even after adjusting for these factors. There was no change in the overall awareness,  
10  
11 treatment and control rates of hypertension between the two surveys in the NCR of Delhi (Table 3).  
12  
13 When stratified by gender the awareness, treatment and control rates of hypertension in men was  
14  
15 lower in the second survey while awareness and treatment but not control rates improved in  
16  
17 women. The overall rates of all three parameters were higher in woman than men. Similarly in urban  
18  
19 areas there was no change in the overall awareness, treatment and control rates of hypertension  
20  
21 between the two surveys though all three parameters decreased in men with no significant change  
22  
23 in women with higher overall rates in women. In rural NCR the overall awareness, treatment and  
24  
25 control rates of hypertension improved between the two surveys. This was seen in men and women  
26  
27 except for control rates in men which did not improve. However, though all three rates improved in  
28  
29 rural areas, the overall awareness (46.4% vs26.8%), treatment (40.0vs 20.4%) and control rates  
30  
31 (15.9vs 8.0%) in rural areas remained much lower than in urban areas.  
32  
33  
34  
35  
36  
37  
38  
39  
40  
41  
42  
43  
44  
45  
46  
47  
48  
49  
50  
51  
52  
53  
54  
55  
56  
57  
58  
59  
60

**Table 1: Age & sex standardized and age-specific prevalence of hypertension: Survey 1 and Survey 2**

|              | Rural          |      |      |                |      |      |                    |       | Urban          |      |      |                |      |      |                    |       |
|--------------|----------------|------|------|----------------|------|------|--------------------|-------|----------------|------|------|----------------|------|------|--------------------|-------|
|              | Survey 1       |      |      | Survey 2       |      |      | P Value-Difference | Ratio | Survey 1       |      |      | Survey 2       |      |      | P Value-Difference | Ratio |
| N            | Prevalence (%) | SE   | N    | Prevalence (%) | SE   | N    |                    |       | Prevalence (%) | SE   | N    | Prevalence (%) | SE   |      |                    |       |
| <b>Total</b> | 2,469          | 11.2 | 0.01 | 1914           | 28.9 | 1    | <0.001             | 2.6   | 3,041          | 23   | 0.01 | 2026           | 42.2 | 1.1  | <0.001             | 1.8   |
| <b>Men</b>   | 1,065          | 12.2 | 0.01 | 981            | 32.6 | 1.5  | <0.001             | 2.9   | 1,451          | 22.3 | 0.01 | 924            | 43.3 | 1.6  | <0.001             | 1.9   |
| <b>Women</b> | 1,404          | 10.2 | 0.01 | 933            | 25.2 | 1.4  | <0.001             | 2.3   | 1,590          | 23.8 | 0.01 | 1102           | 41.1 | 1.4  | <0.001             | 1.7   |
| <b>Men</b>   |                |      |      |                |      |      |                    |       |                |      |      |                |      |      |                    |       |
| 35-44        | 441            | 8.1  | 0.01 | 459            | 27.4 | 0.02 | <0.001             | 3.4   | 646            | 13.4 | 0.01 | 434            | 33.9 | 0.02 | <0.001             | 2.5   |
| 45-54        | 318            | 12.2 | 0.02 | 315            | 36.1 | 0.03 | <0.001             | 3     | 432            | 21.6 | 0.02 | 299            | 47.9 | 0.03 | <0.001             | 2.2   |
| 55-64        | 306            | 21.6 | 0.02 | 207            | 38.6 | 0.03 | <0.001             | 1.8   | 373            | 34.5 | 0.03 | 191            | 42.5 | 0.02 | NS                 | 1     |
| <b>Women</b> |                |      |      |                |      |      |                    |       |                |      |      |                |      |      |                    |       |
| 35-44        | 667            | 4.3  | 0.01 | 433            | 18.7 | 0.02 | <0.001             | 4.4   | 723            | 12.8 | 0.01 | 521            | 27.6 | 0.02 | <0.001             | 2.2   |
| 45-54        | 438            | 9.4  | 0.01 | 277            | 28.5 | 0.03 | 0.001              | 3     | 450            | 25.9 | 0.02 | 321            | 46.9 | 0.03 | <0.001             | 1.8   |
| 55-64        | 299            | 23.1 | 0.02 | 223            | 33.3 | 0.03 | 0.011              | 1.4   | 417            | 57.6 | 0.04 | 260            | 59.8 | 0.03 | NS                 | 1     |

*N- Sample size; SE- Standard Error; Ratio-Survey2/Survey1; NS-not statistically significant*

1  
2  
3  
4  
5  
6  
7  
8  
9  
10  
11  
12  
13  
14  
15  
16  
17  
18  
19  
20  
21  
22  
23  
24  
25  
26  
27  
28  
29  
30  
31  
32  
33  
34  
35  
36  
37  
38  
39  
40  
41  
42  
43  
44  
45  
46  
47  
48  
49

| <b>Table-2: Odds of hypertension in Survey 2 relative to odds for hypertension in Survey 1</b> |                       |                |
|------------------------------------------------------------------------------------------------|-----------------------|----------------|
|                                                                                                | Odds ratio (95% C.I.) |                |
|                                                                                                | Rural                 | Urban          |
| Unadjusted                                                                                     | 3.2 (2.7, 3.8)        | 2.3 (2.0, 2.6) |
| Adjusted for age                                                                               | 3.4 (2.9, 4.0)        | 2.6 (2.3, 2.9) |
| Adjusted for age and gender                                                                    | 3.3 (2.8, 3.9)        | 2.6 (2.3, 2.9) |
| Adjusted for age, gender and obesity                                                           | 3.1 (2.6, 3.6)        | 2.6 (2.2, 2.9) |
| Adjusted for age, gender, obesity and diabetes                                                 | 3.4 (2.7, 4.3)        | 2.4 (2.1, 2.8) |
| Adjusted for age, gender, obesity, diabetes and alcohol use                                    | 3.3 (2.5, 4.3)        | 2.4 (2.1, 2.7) |

**Table-3: Hypertension awareness, treatment and control among hypertensive population in NCR of Delhi: Survey 1 and Survey 2**

|              | Awareness |          |         | Treatment |          |         | Control  |          |         |
|--------------|-----------|----------|---------|-----------|----------|---------|----------|----------|---------|
|              | Survey 1  | Survey 2 | P value | Survey 1  | Survey 2 | P value | Survey 1 | Survey 2 | P value |
| <b>Total</b> | 37.5      | 38.7     | NS      | 32        | 32.3     | NS      | 14.4     | 12.8     | NS      |
| Men          | 33.1      | 26.8     | 0.02    | 28.3      | 21.1     | 0.01    | 13.1     | 7.1      | 0.01    |
| Women        | 41.5      | 51.1     | 0.001   | 35.4      | 43.9     | 0.001   | 15.6     | 18.7     | NS      |
| <b>Urban</b> |           |          |         |           |          |         |          |          |         |
| Total        | 49        | 46.4     | NS      | 41.6      | 40       | NS      | 19       | 15.9     | NS      |
| Men          | 44.3      | 34.7     | 0.01    | 37.8      | 29.2     | 0.01    | 17.6     | 10.7     | 0.01    |
| Women        | 53.2      | 56.9     | NS      | 45        | 49.6     | NS      | 20.2     | 20.4     | NS      |
| <b>Rural</b> |           |          |         |           |          |         |          |          |         |
| Total        | 7.2       | 26.8     | 0.001   | 6.8       | 20.4     | 0       | 2.5      | 8        | 0.001   |
| Men          | 5.7       | 17       | 0.001   | 5         | 11       | 0.04    | 2.1      | 2.5      | NS      |
| Women        | 8.7       | 40       | <0.001  | 8.7       | 33.2     | <0.001  | 2.9      | 15.3     | <0.001  |

NS- not statistically significant

## Discussion

The repeat survey in NCR of Delhi done after two decades shows (1) continued gradient in urban rural prevalence of hypertension (2) Significant increases in prevalence of hypertension both in urban and rural areas with a higher increase in rural areas,(3) highest increase in prevalence of hypertension in the youngest age group (35-44 years) surveyed, (4) a rightward shift in the distribution of blood pressure in both urban and rural populations with fewer individuals with optimum blood pressure (<120/80), (5)strong relationship between the prevalence of hypertension and BMI, education level, fasting glucose levels and alcohol use, however, even after adjusting for all the predictor variables the odds of hypertension remained higher in the second survey (6) no change in overall awareness , treatment and control rates of hypertension in NCR

Prevalence of hypertension has been consistently increasing over the years; however, most reviews from India have included old studies. Recent repeat surveys done in other cities have shown varying results. A study from Jaipur revealed no significant change in hypertension prevalence over 2 decades from 1990 with a decrease in mean systolic blood pressure during this period[12]. A repeat survey from Chennai showed rise in self-reported prevalence in hypertension in low and middle income groups[13]. However, both these studies included only urban subjects and utilised convenience sampling and thus were not representative of the population. Our study done on a representative urban and rural sample revealed that the prevalence of hypertension increased in urban and rural areas with a higher rate of rise in the rural population. A recent systematic review of hypertension found a prevalence of 27.6% in rural India though it was only 16.7% in Northern India[6] which was at variance with our findings. However, more recent studies from North India have suggested prevalence of 22% and 32%in similar age groups, which is close to the prevalence in our study of 28.9% and those from other parts of rural India[14,15].

1  
2  
3 The age stratified prevalence showed increase in all age groups except the oldest in urban areas,  
4  
5 with the highest rate of rise of hypertension in the youngest age group (35-44 years). Indirect  
6  
7 evidence of high burden of risk factors in young comes from occurrence of cardiovascular diseases at  
8  
9 younger age in South Asians as compared the Caucasians[4]. A study among the young individuals  
10  
11 (20-30 years) from South India revealed a very high burden of 45.2% of pre-hypertension in the  
12  
13 population[16]. However, the rapid rise of the burden of hypertension in young in last two decades  
14  
15 has probably been demonstrated for the first time in this study and is worrisome and calls for urgent  
16  
17 action to prevent further burden of pre-mature CVD in Indians.  
18  
19

20  
21 The other important finding was the worsening of population blood pressure levels over two  
22  
23 decades with a significantly lower proportion of the population having optimum blood pressure and  
24  
25 more of them having pre-hypertension and hypertension. Small shifts in population blood pressure  
26  
27 levels is known to lead to large increases in the burden of CVD in the community [17] and thus this  
28  
29 also portends future worsening of CVD epidemic in India. It calls for population level intervention  
30  
31 like advocacy for salt reduction, weight reduction and increase physical activity. The prevalence of  
32  
33 hypertension was expectantly dependant on BMI and fasting glucose levels with higher rates among  
34  
35 overweight and obese and those with impaired fasting glucose and diabetes. This finding is  
36  
37 consistent across most studies in India and abroad [18–20]. The association of hypertension in India  
38  
39 with education is variable. A recent large cohort study from South Asia reported higher prevalence  
40  
41 among more educated[21].Some have reported reverse gradient with education[22]while others  
42  
43 have reported no relationship[23][24].Alcohol use was associated with higher prevalence of  
44  
45 hypertension as seen in other studies[25]. Limited data from South Asia suggests higher blood  
46  
47 pressure levels in alcohol users [26]and also higher probability of MI in them than alcohol  
48  
49 abstainers[27] unlike other population groups. Interestingly, the rise in prevalence of hypertension  
50  
51 in Survey 2 was significant even after adjusting for these factors. This could be due to other lifestyle  
52  
53  
54  
55  
56  
57  
58  
59  
60

1  
2  
3 factors known to be associated with high blood pressure like diet, physical activity, stress etc not  
4  
5 being accounted for as data for this was not available for both studies.  
6  
7

8 The prevalence, awareness and control rates for hypertension were overall sub-optimal with no  
9  
10 improvement between the 2 surveys. The rates of awareness, treatment and control of hypertension  
11  
12 were comparable to the pooled estimates reported in systematic reviews with better rates in urban  
13  
14 areas as compared to rural areas[2,6]. Additionally these rates were better in women as compared  
15  
16 to men, as has been reported consistently in large studies from India and abroad[28,29]. This is  
17  
18 related to greater health seeking behaviour in women. This study additionally provided insights into  
19  
20 the change in these rates over the last two decades which is not available from India earlier. The  
21  
22 disturbing fact was that despite rising prevalence of hypertension there was no improvement in  
23  
24 these rates with all three rates worsening in men with improvement in awareness, treatment but  
25  
26 not control rates in women. When analysed by site and gender all rates except control rates in men  
27  
28 improved in rural areas while in urban areas they worsened in men and remained unchanged in  
29  
30 women. However, the overall rates in rural areas were still much lower than urban areas and the  
31  
32 improvement in rural areas could be attributed to low rates in the first survey.  
33  
34  
35  
36

### 37 **Strengths and limitations**

38  
39 The strengths of this study is that it surveyed population representative sample in the same  
40  
41 population using similar methodologies and was adequately powered, thus providing opportunity to  
42  
43 compare hypertension statistics at two time periods. Such temporal trend was not available from  
44  
45 urban and rural areas of India earlier. One of the limitations of this study is that the apparatus used  
46  
47 for blood pressure measurement was different in the two studies. This was inevitable since the  
48  
49 apparatus used in first survey was unavailable at the time of the next survey. The two apparatus  
50  
51 have marginal difference and if anything the current method of automated blood pressure monitors  
52  
53 is known to underestimate blood pressure[30] and thus the prevalence and shift in blood pressure  
54  
55  
56  
57  
58  
59  
60



1  
2  
3 levels in the population would only be higher. The other limitation is that behavioural risk factors like  
4  
5 diet and physical activity were not assessed during the first survey and therefore not reported and  
6  
7 they could account for difference in blood pressure levels as discussed. The study being restricted to  
8  
9 urban and rural NCR of Delhi, may not be generalizable across India though similar prevalence rates  
10  
11 have been reported across the country.  
12

### 13 14 **Conclusions**

15  
16  
17 This two time survey of NCR of Delhi shows marked increase in prevalence of hypertension in the  
18  
19 last two decades both in rural and urban areas with higher rates of increase in younger age. This was  
20  
21 also associated with fewer individuals with optimum blood pressure and more with pre-  
22  
23 hypertension and hypertension. This calls for urgent population and high risk approach to lower  
24  
25 blood pressure in the community as the awareness, treatment and control levels showed no  
26  
27 improvement over this time frame.  
28  
29

### 30 31 **Figure Legend**

32  
33  
34 Figure-1: Distribution of BP categories (%) in untreated population of NCR of Delhi: A) Urban Men;  
35  
36 (B) Urban Women; (C) Rural Men; (D) Rural Women  
37  
38

39  
40 Figure-2: Prevalence (%) of hypertension stratified by risk factors: (A) Education status; (B) Body  
41  
42 Mass Index(BMI); (C) Fasting Plasma Glucose; (D) Alcohol Use  
43  
44  
45  
46  
47  
48  
49  
50  
51  
52  
53  
54  
55  
56  
57  
58  
59  
60

## References

- 1 Lim SS, Vos T, Flaxman AD, *et al.* A comparative risk assessment of burden of disease and injury attributable to 67 risk factors and risk factor clusters in 21 regions, 1990-2010: a systematic analysis for the Global Burden of Disease Study 2010. *Lancet* 2012;**380**:2224–60. doi:10.1016/S0140-6736(12)61766-8
- 2 Devi P, Rao M, Sigamani A, *et al.* Prevalence, risk factors and awareness of hypertension in India: a systematic review. *J Hum Hypertens* 2013;**27**:281–7. doi:10.1038/jhh.2012.33
- 3 Gupta R. Trends in hypertension epidemiology in India. *J Hum Hypertens* 2004;**18**:73–8. doi:10.1038/sj.jhh.1001633
- 4 Prabhakaran D, Jeemon P, Roy A. Cardiovascular Diseases in India. *Circulation* 2016;**133**:1605–20. doi:10.1161/CIRCULATIONAHA.114.008729
- 5 Kearney PM, Whelton M, Reynolds K, *et al.* Global burden of hypertension: analysis of worldwide data. *Lancet*; **365**:217–23. doi:10.1016/S0140-6736(05)17741-1
- 6 Anchala R, Kannuri NK, Pant H, *et al.* Hypertension in India: a systematic review and meta-analysis of prevalence, awareness, and control of hypertension. *J Hypertens* 2014;**32**:1170–7. doi:10.1097/HJH.0000000000000146
- 7 United Nations. UN General Assembly resolution on the prevention and control of non communicable diseases. 2010. www.un.org (accessed 5 Mar2014).
- 8 World Health Organization. NCD Global Monitoring Framework. 2013. [http://www.who.int/nmh/global\\_monitoring\\_framework](http://www.who.int/nmh/global_monitoring_framework) (accessed 5 Mar2014).
- 9 Prabhakaran D, A Roy, Praveen PA, Ritvik A, Singh K, Kondal D, Ruby G, Lakshmy R, N Tandon, Reddy K S AK. Twenty year trend in the prevalence of cardiovascular disease risk factors in

- 1  
2  
3 the Urban and Rural areas of National Capital Region (NCR), India. *Glob Heart* 2016 (in press).  
4  
5  
6 10 Chobanian A V, Bakris GL, Black HR, *et al.* The Seventh Report of the Joint National  
7  
8 Committee on Prevention, Detection, Evaluation, and Treatment of High Blood Pressure: the  
9  
10 JNC 7 report. *JAMA* 2003;**289**:2560–72. doi:10.1001/jama.289.19.2560  
11  
12  
13 11 Misra A, Chowbey P, Makkar BM, *et al.* Consensus statement for diagnosis of obesity,  
14  
15 abdominal obesity and the metabolic syndrome for Asian Indians and recommendations for  
16  
17 physical activity, medical and surgical management. *J Assoc Physicians India* 2009;**57**:163–  
18  
19 70. <http://www.ncbi.nlm.nih.gov/pubmed/19582986>  
20  
21  
22 12 Gupta R, Guptha S, Gupta VP, *et al.* Twenty-year trends in cardiovascular risk factors in India  
23  
24 and influence of educational status. *Eur J Prev Cardiol* 2012;**19**:1258–71.  
25  
26 doi:10.1177/1741826711424567  
27  
28  
29 13 Deepa M, Anjana RM, Manjula D, *et al.* Convergence of prevalence rates of diabetes and  
30  
31 cardiometabolic risk factors in middle and low income groups in urban India: 10-year follow-  
32  
33 up of the Chennai Urban Population Study. *J Diabetes Sci Technol* 2011;**5**:918–  
34  
35 27. [http://www.pubmedcentral.nih.gov/articlerender.fcgi?artid=3192599&tool=pmcentrez&](http://www.pubmedcentral.nih.gov/articlerender.fcgi?artid=3192599&tool=pmcentrez&rendertype=abstract)  
36  
37 [http://www.pubmedcentral.nih.gov/articlerender.fcgi?artid=3192599&tool=pmcentrez&](http://www.pubmedcentral.nih.gov/articlerender.fcgi?artid=3192599&tool=pmcentrez&rendertype=abstract)  
38 [http://www.pubmedcentral.nih.gov/articlerender.fcgi?artid=3192599&tool=pmcentrez&](http://www.pubmedcentral.nih.gov/articlerender.fcgi?artid=3192599&tool=pmcentrez&rendertype=abstract)  
39 [http://www.pubmedcentral.nih.gov/articlerender.fcgi?artid=3192599&tool=pmcentrez&](http://www.pubmedcentral.nih.gov/articlerender.fcgi?artid=3192599&tool=pmcentrez&rendertype=abstract)  
40 [http://www.pubmedcentral.nih.gov/articlerender.fcgi?artid=3192599&tool=pmcentrez&](http://www.pubmedcentral.nih.gov/articlerender.fcgi?artid=3192599&tool=pmcentrez&rendertype=abstract)  
41 [http://www.pubmedcentral.nih.gov/articlerender.fcgi?artid=3192599&tool=pmcentrez&](http://www.pubmedcentral.nih.gov/articlerender.fcgi?artid=3192599&tool=pmcentrez&rendertype=abstract)  
42 [http://www.pubmedcentral.nih.gov/articlerender.fcgi?artid=3192599&tool=pmcentrez&](http://www.pubmedcentral.nih.gov/articlerender.fcgi?artid=3192599&tool=pmcentrez&rendertype=abstract)  
43 [http://www.pubmedcentral.nih.gov/articlerender.fcgi?artid=3192599&tool=pmcentrez&](http://www.pubmedcentral.nih.gov/articlerender.fcgi?artid=3192599&tool=pmcentrez&rendertype=abstract)  
44 [http://www.pubmedcentral.nih.gov/articlerender.fcgi?artid=3192599&tool=pmcentrez&](http://www.pubmedcentral.nih.gov/articlerender.fcgi?artid=3192599&tool=pmcentrez&rendertype=abstract)  
45 [http://www.pubmedcentral.nih.gov/articlerender.fcgi?artid=3192599&tool=pmcentrez&](http://www.pubmedcentral.nih.gov/articlerender.fcgi?artid=3192599&tool=pmcentrez&rendertype=abstract)  
46 [http://www.pubmedcentral.nih.gov/articlerender.fcgi?artid=3192599&tool=pmcentrez&](http://www.pubmedcentral.nih.gov/articlerender.fcgi?artid=3192599&tool=pmcentrez&rendertype=abstract)  
47 [http://www.pubmedcentral.nih.gov/articlerender.fcgi?artid=3192599&tool=pmcentrez&](http://www.pubmedcentral.nih.gov/articlerender.fcgi?artid=3192599&tool=pmcentrez&rendertype=abstract)  
48 [http://www.pubmedcentral.nih.gov/articlerender.fcgi?artid=3192599&tool=pmcentrez&](http://www.pubmedcentral.nih.gov/articlerender.fcgi?artid=3192599&tool=pmcentrez&rendertype=abstract)  
49 [http://www.pubmedcentral.nih.gov/articlerender.fcgi?artid=3192599&tool=pmcentrez&](http://www.pubmedcentral.nih.gov/articlerender.fcgi?artid=3192599&tool=pmcentrez&rendertype=abstract)  
50 [http://www.pubmedcentral.nih.gov/articlerender.fcgi?artid=3192599&tool=pmcentrez&](http://www.pubmedcentral.nih.gov/articlerender.fcgi?artid=3192599&tool=pmcentrez&rendertype=abstract)  
51 [http://www.pubmedcentral.nih.gov/articlerender.fcgi?artid=3192599&tool=pmcentrez&](http://www.pubmedcentral.nih.gov/articlerender.fcgi?artid=3192599&tool=pmcentrez&rendertype=abstract)  
52 [http://www.pubmedcentral.nih.gov/articlerender.fcgi?artid=3192599&tool=pmcentrez&](http://www.pubmedcentral.nih.gov/articlerender.fcgi?artid=3192599&tool=pmcentrez&rendertype=abstract)  
53 [http://www.pubmedcentral.nih.gov/articlerender.fcgi?artid=3192599&tool=pmcentrez&](http://www.pubmedcentral.nih.gov/articlerender.fcgi?artid=3192599&tool=pmcentrez&rendertype=abstract)  
54 16 Kini S, Kamath VG, Kulkarni MM, *et al.* Pre-Hypertension among Young Adults (20-30 Years) in  
55  
56 Coastal Villages of Udupi District in Southern India: An Alarming Scenario. *PLoS One*  
57  
58  
59  
60

- 1  
2  
3 2016;**11**:e0154538. doi:10.1371/journal.pone.0154538  
4  
5  
6 17 Lewington S, Clarke R, Qizilbash N, *et al*. Age-specific relevance of usual blood pressure to  
7  
8 vascular mortality: a meta-analysis of individual data for one million adults in 61 prospective  
9  
10 studies. *Lancet* 2002;**360**:1903–13. <http://www.ncbi.nlm.nih.gov/pubmed/12493255>  
11  
12 (accessed 2 Feb2015).  
13  
14  
15 18 Cutler JA, Sorlie PD, Wolz M, *et al*. Trends in hypertension prevalence, awareness, treatment,  
16  
17 and control rates in United States adults between 1988-1994 and 1999-2004. *Hypertension*  
18  
19 2008;**52**:818–27. doi:10.1161/HYPERTENSIONAHA.108.113357  
20  
21  
22 19 Menéndez E, Delgado E, Fernández-Vega F, *et al*. Prevalence, Diagnosis, Treatment, and  
23  
24 Control of Hypertension in Spain. Results of the Di@bet.es Study. *Rev española Cardiol*  
25  
26 (English ed) 2016;**69**:572–8. doi:10.1016/j.rec.2015.11.034  
27  
28  
29  
30 20 Bhadoria AS, Kasar PK, Toppo NA, *et al*. Prevalence of hypertension and associated  
31  
32 cardiovascular risk factors in Central India. *J Family Community Med* 2014;**21**:29–38.  
33  
34 doi:10.4103/2230-8229.128775  
35  
36  
37 21 Ali MK, Bhaskarapillai B, Shivashankar R, *et al*. Socioeconomic status and cardiovascular risk in  
38  
39 urban South Asia: The CARRS Study. *Eur J Prev Cardiol* 2016;**23**:408–19.  
40  
41 doi:10.1177/2047487315580891  
42  
43  
44 22 Reddy KS, Prabhakaran D, Jeemon P, *et al*. Educational status and cardiovascular risk profile  
45  
46 in Indians. *Proc Natl Acad Sci U S A* 2007;**104**:16263–8. doi:10.1073/pnas.0700933104  
47  
48  
49 23 Samuel P, Antonisamy B, Raghupathy P, *et al*. Socio-economic status and cardiovascular risk  
50  
51 factors in rural and urban areas of Vellore, Tamilnadu, South India. *Int J Epidemiol*  
52  
53 2012;**41**:1315–27. doi:10.1093/ije/dys001  
54  
55  
56  
57  
58  
59  
60

- 1  
2  
3 24 Kar SS, Thakur JS, Viridi NK, *et al.* Risk factors for cardiovascular diseases: is the social gradient  
4 reversing in northern India? *Natl Med J India*;23:206–  
5  
6  
7 9.http://www.ncbi.nlm.nih.gov/pubmed/21192513 (accessed 30 May2016).  
8  
9  
10 25 Huang X, Zhou Z, Liu J, *et al.* Prevalence, awareness, treatment, and control of hypertension  
11 among China’s Sichuan Tibetan population: A cross-sectional study. *Clin Exp Hypertens*  
12 2016;**38**:457–63. doi:10.3109/10641963.2016.1163369  
13  
14  
15  
16  
17 26 Roy A, Prabhakaran D, Jeemon P, *et al.* Impact of alcohol on coronary heart disease in Indian  
18 men. *Atherosclerosis* 2010;**210**:531–5. doi:10.1016/j.atherosclerosis.2010.02.033  
19  
20  
21  
22 27 Leong DP, Smyth A, Teo KK, *et al.* Patterns of alcohol consumption and myocardial infarction  
23 risk: observations from 52 countries in the INTERHEART case-control study. *Circulation*  
24 2014;**130**:390–8. doi:10.1161/CIRCULATIONAHA.113.007627  
25  
26  
27  
28  
29 28 Chow CK, Teo KK, Rangarajan S, *et al.* Prevalence, awareness, treatment, and control of  
30 hypertension in rural and urban communities in high-, middle-, and low-income countries.  
31  
32  
33  
34  
35  
36  
37  
38 29 Irazola VE, Gutierrez L, Bloomfield G, *et al.* Hypertension Prevalence, Awareness, Treatment,  
39 and Control in Selected LMIC Communities. *Glob Heart* 2016;**11**:47–59.  
40  
41  
42  
43  
44  
45 30 Ostchega Y, Zhang G, Sorlie P, *et al.* Blood pressure randomized methodology study  
46 comparing automatic oscillometric and mercury sphygmomanometer devices: National  
47  
48  
49  
50  
51  
52  
53  
54  
55  
56  
57  
58  
59  
60

Figure 1 : Distribution of BP categories (%) in untreated population of NCR of Delhi

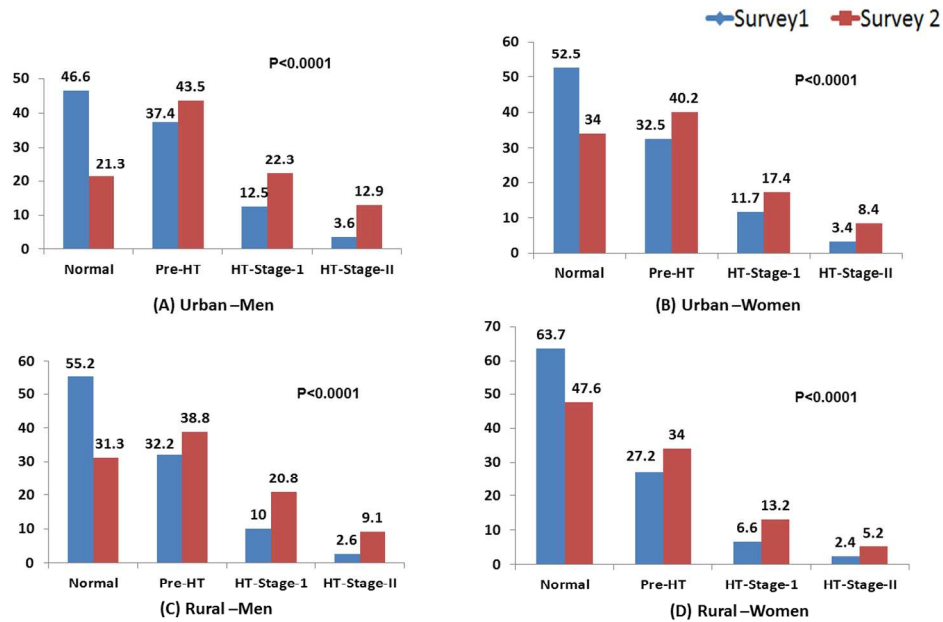

HT: Hypertension; Normal: BP<120mmHg and DBP<80 mmHg; Pre hypertension: BP 120-139 mmHg or DBP 80-89 mmHg; Hypertension Stage I: SBP 140-159or DBP 90-99; Hypertension Stage II: SBP≥160 or DBP≥ 100; S1: Survey-1; S2: Survey-2; \* Difference in distribution of blood pressure categories of Survey 1 &2

Figure-1: Distribution of BP categories (%) in untreated population of NCR of Delhi: A) Urban Men; (B) Urban Women; (C) Rural Men; (D) Rural Women

260x193mm (300 x 300 DPI)

Figure-2: Prevalence (%) of hypertension stratified by risk factors

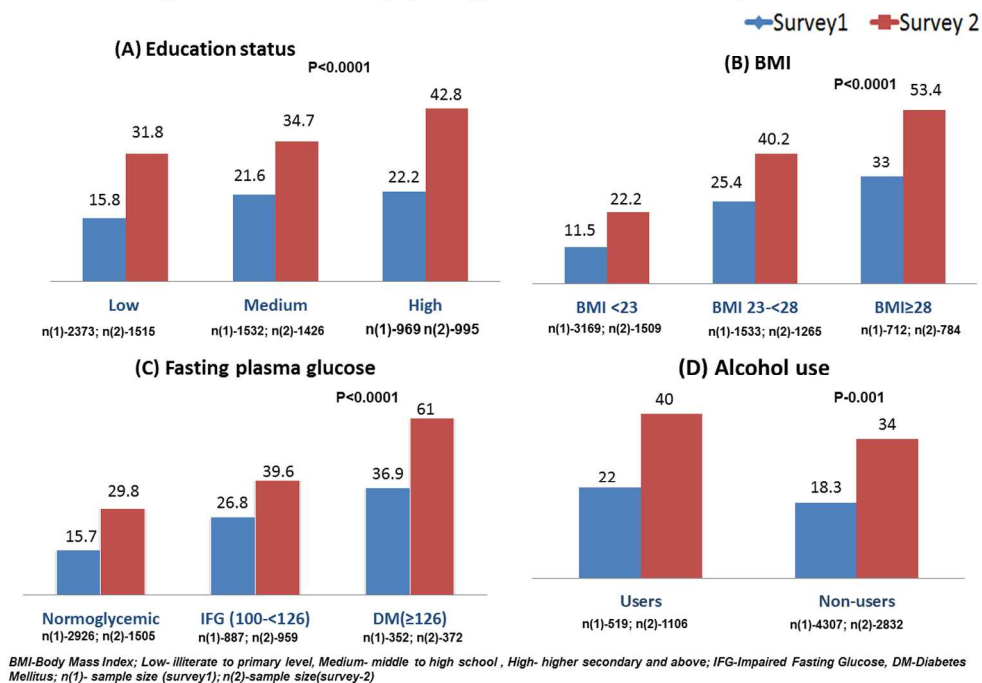

Figure-2: Prevalence (%) of hypertension stratified by risk factors: (A) Education status; (B) Body Mass Index(BMI); (C) Fasting Plasma Glucose; (D) Alcohol Use

130x96mm (600 x 600 DPI)

STROBE 2007 (v4) Statement—Checklist of items that should be included in reports of *cross-sectional studies*

| Section/Topic             | Item # | Recommendation                                                                                                                                                                       | Reported on page # |
|---------------------------|--------|--------------------------------------------------------------------------------------------------------------------------------------------------------------------------------------|--------------------|
| Title and abstract        | 1      | (a) Indicate the study’s design with a commonly used term in the title or the abstract                                                                                               | 3                  |
|                           |        | (b) Provide in the abstract an informative and balanced summary of what was done and what was found                                                                                  | 3                  |
| <b>Introduction</b>       |        |                                                                                                                                                                                      |                    |
| Background/rationale      | 2      | Explain the scientific background and rationale for the investigation being reported                                                                                                 | 5                  |
| Objectives                | 3      | State specific objectives, including any prespecified hypotheses                                                                                                                     | 5                  |
| <b>Methods</b>            |        |                                                                                                                                                                                      |                    |
| Study design              | 4      | Present key elements of study design early in the paper                                                                                                                              | 5                  |
| Setting                   | 5      | Describe the setting, locations, and relevant dates, including periods of recruitment, exposure, follow-up, and data collection                                                      | 5,6                |
| Participants              | 6      | (a) Give the eligibility criteria, and the sources and methods of selection of participants                                                                                          | 6                  |
| Variables                 | 7      | Clearly define all outcomes, exposures, predictors, potential confounders, and effect modifiers. Give diagnostic criteria, if applicable                                             | 6                  |
| Data sources/ measurement | 8*     | For each variable of interest, give sources of data and details of methods of assessment (measurement). Describe comparability of assessment methods if there is more than one group | 6,7                |
| Bias                      | 9      | Describe any efforts to address potential sources of bias                                                                                                                            |                    |
| Study size                | 10     | Explain how the study size was arrived at                                                                                                                                            | 5                  |
| Quantitative variables    | 11     | Explain how quantitative variables were handled in the analyses. If applicable, describe which groupings were chosen and why                                                         | 7                  |
| Statistical methods       | 12     | (a) Describe all statistical methods, including those used to control for confounding                                                                                                | 7                  |
|                           |        | (b) Describe any methods used to examine subgroups and interactions                                                                                                                  | 7                  |
|                           |        | (c) Explain how missing data were addressed                                                                                                                                          | 5                  |
|                           |        | (d) If applicable, describe analytical methods taking account of sampling strategy                                                                                                   | 7                  |
|                           |        | (e) Describe any sensitivity analyses                                                                                                                                                | 5                  |
| <b>Results</b>            |        |                                                                                                                                                                                      |                    |



|                          |     |                                                                                                                                                                                                              |                |
|--------------------------|-----|--------------------------------------------------------------------------------------------------------------------------------------------------------------------------------------------------------------|----------------|
| Participants             | 13* | (a) Report numbers of individuals at each stage of study—eg numbers potentially eligible, examined for eligibility, confirmed eligible, included in the study, completing follow-up, and analysed            | 6              |
|                          |     | (b) Give reasons for non-participation at each stage                                                                                                                                                         | Not applicable |
|                          |     | (c) Consider use of a flow diagram                                                                                                                                                                           | Not applicable |
| Descriptive data         | 14* | (a) Give characteristics of study participants (eg demographic, clinical, social) and information on exposures and potential confounders                                                                     | 7,8            |
|                          |     | (b) Indicate number of participants with missing data for each variable of interest                                                                                                                          | 10,12          |
| Outcome data             | 15* | Report numbers of outcome events or summary measures                                                                                                                                                         | 10,12          |
| Main results             | 16  | (a) Give unadjusted estimates and, if applicable, confounder-adjusted estimates and their precision (eg, 95% confidence interval). Make clear which confounders were adjusted for and why they were included | 11             |
|                          |     | (b) Report category boundaries when continuous variables were categorized                                                                                                                                    | 7              |
|                          |     | (c) If relevant, consider translating estimates of relative risk into absolute risk for a meaningful time period                                                                                             | Not applicable |
| Other analyses           | 17  | Report other analyses done—eg analyses of subgroups and interactions, and sensitivity analyses                                                                                                               | 7              |
| <b>Discussion</b>        |     |                                                                                                                                                                                                              |                |
| Key results              | 18  | Summarise key results with reference to study objectives                                                                                                                                                     | 13             |
| Limitations              | 19  | Discuss limitations of the study, taking into account sources of potential bias or imprecision. Discuss both direction and magnitude of any potential bias                                                   | 15,16          |
| Interpretation           | 20  | Give a cautious overall interpretation of results considering objectives, limitations, multiplicity of analyses, results from similar studies, and other relevant evidence                                   | 13,14          |
| Generalisability         | 21  | Discuss the generalisability (external validity) of the study results                                                                                                                                        | 14             |
| <b>Other information</b> |     |                                                                                                                                                                                                              |                |
| Funding                  | 22  | Give the source of funding and the role of the funders for the present study and, if applicable, for the original study on which the present article is based                                                | 2              |

\*Give information separately for cases and controls in case-control studies and, if applicable, for exposed and unexposed groups in cohort and cross-sectional studies.

**Note:** An Explanation and Elaboration article discusses each checklist item and gives methodological background and published examples of transparent reporting. The STROBE checklist is best used in conjunction with this article (freely available on the Web sites of PLoS Medicine at <http://www.plosmedicine.org/>, Annals of Internal Medicine at <http://www.annals.org/>, and Epidemiology at <http://www.epidem.com/>). Information on the STROBE Initiative is available at [www.strobe-statement.org](http://www.strobe-statement.org).

# BMJ Open

## Changes in Hypertension Prevalence, Awareness, Treatment and Control Rates Over Twenty Years in National Capital Region of India

|                                 |                                                                                                                                                                                                                                                                                                                                                                                                                                                                                                                                                                                                                                                                                                                                                                                                                                                                                                                      |
|---------------------------------|----------------------------------------------------------------------------------------------------------------------------------------------------------------------------------------------------------------------------------------------------------------------------------------------------------------------------------------------------------------------------------------------------------------------------------------------------------------------------------------------------------------------------------------------------------------------------------------------------------------------------------------------------------------------------------------------------------------------------------------------------------------------------------------------------------------------------------------------------------------------------------------------------------------------|
| Journal:                        | <i>BMJ Open</i>                                                                                                                                                                                                                                                                                                                                                                                                                                                                                                                                                                                                                                                                                                                                                                                                                                                                                                      |
| Manuscript ID                   | bmjopen-2016-015639.R1                                                                                                                                                                                                                                                                                                                                                                                                                                                                                                                                                                                                                                                                                                                                                                                                                                                                                               |
| Article Type:                   | Research                                                                                                                                                                                                                                                                                                                                                                                                                                                                                                                                                                                                                                                                                                                                                                                                                                                                                                             |
| Date Submitted by the Author:   | 24-Mar-2017                                                                                                                                                                                                                                                                                                                                                                                                                                                                                                                                                                                                                                                                                                                                                                                                                                                                                                          |
| Complete List of Authors:       | Roy, Ambuj; All India Institute of Medical Sciences, Cardiology<br>Praveen , Pradeep A; All India Institute of Medical Sciences, Endocrinology and Metabolism<br>Amarchand, Ritvik; All India Institute of Medical Sciences, Ramakrishnan, Lakshmy; All India Institute of Medical Sciences, Cardiac Biochemistry<br>Gupta, Ruby; Public Health Foundation of India<br>Kondal, Dimple; Public Health Foundation of India<br>Singh, Kalpana; Public Health Foundation of India<br>Sharma , Meenakshi; Indian Council of Medical Research<br>Shukla, DK; Indian Council Of Medical Research, Non-communicable Diseases<br>Tandon, Nikhil; All India Institute of Medical Sciences, Endocrinology and Metabolism<br>Reddy, KS; Public Health Foundation of India<br>Anand, Krishnan; All India Institute of Medical Sciences, Center for Community Medicine<br>Prabhakaran, Dorairaj; Public Health Foundation of India |
| <b>Primary Subject Heading</b>: | Cardiovascular medicine                                                                                                                                                                                                                                                                                                                                                                                                                                                                                                                                                                                                                                                                                                                                                                                                                                                                                              |
| Secondary Subject Heading:      | Epidemiology                                                                                                                                                                                                                                                                                                                                                                                                                                                                                                                                                                                                                                                                                                                                                                                                                                                                                                         |
| Keywords:                       | Hypertension < CARDIOLOGY, Pre Hypertension, Cardiovascular disease risk factors, Secular trends, India                                                                                                                                                                                                                                                                                                                                                                                                                                                                                                                                                                                                                                                                                                                                                                                                              |
|                                 |                                                                                                                                                                                                                                                                                                                                                                                                                                                                                                                                                                                                                                                                                                                                                                                                                                                                                                                      |

SCHOLARONE™  
Manuscripts

**Title:** Changes in Hypertension Prevalence, Awareness, Treatment and Control Rates Over Twenty Years in National Capital Region of India

**Sub Title:** Change in hypertension burden over 20 years-NCR, India

**List of Authors and Affiliations**

Ambuj Roy, MD, DM\*

Professor of Cardiology, All India Institute of Medical Sciences, New Delhi, India,

Email: [drambujroy@gmail.com](mailto:drambujroy@gmail.com)

Pradeep A Praveen, MPH

Doctoral Student, Department of Endocrinology and Metabolism,

All India Institute of Medical Sciences, New Delhi, India, Email: [praveen.aims@gmail.com](mailto:praveen.aims@gmail.com)

Ritvik Amarchand, MBBS, PhD

Centre for Community Medicine, All India Institute of Medical Sciences, New Delhi, India,

Email: [drritvik@gmail.com](mailto:drritvik@gmail.com)

Lakshmy Ramakrishnan, PhD

Professor, Department of Cardiac Biochemistry, All India Institute of Medical Sciences, New Delhi,

India, Email: [lakshmy\\_ram@yahoo.com](mailto:lakshmy_ram@yahoo.com)

Ruby Gupta, PhD

Scientific Officer (Biochemistry), Public Health Foundation of India, Gurgaon, India,

Email: [ruby.gupta@phfi.org](mailto:ruby.gupta@phfi.org)

Dimple Kondal, PhD

Statistician, Public Health Foundation of India, Gurgaon, India, Email: [dimple@ccdcindia.org](mailto:dimple@ccdcindia.org)

Kalpana Singh, MSc

Statistician, Public Health Foundation of India, Gurgaon, India, Email: [kalpana.sing@phfi.org](mailto:kalpana.sing@phfi.org)

Meenakshi Sharma, PhD

Scientist E, Indian Council of Medical Research, New Delhi, India, Email: [smeenakshi@hotmail.com](mailto:smeenakshi@hotmail.com)

Deepak Kumar Shukla, PhD

Scientist G & Head, Division of Non Communicable Diseases, Indian Council of Medical Research,

New Delhi, India, Email: [shukladk@icmr.org.in](mailto:shukladk@icmr.org.in)

Nikhil Tandon, MD, PhD

Professor & Head, Department of Endocrinology and Metabolism, All India Institute of Medical

Sciences, New Delhi, India, Email: [nikhil\\_tandon@hotmail.com](mailto:nikhil_tandon@hotmail.com)

Kolli Srinath Reddy, MD, DM, MSc

President, Public Health Foundation of India, Gurgaon, India, Email: [ksrinath.reddy@phfi.org](mailto:ksrinath.reddy@phfi.org)

Anand Krishnan, MD, PhD

Professor, Centre for Community Medicine, All India Institute of Medical Sciences, New Delhi, India,

Email: [kanandiyer@yahoo.com](mailto:kanandiyer@yahoo.com)

1  
2  
3 Dorairaj Prabhakaran, MD, DM, MSc  
4 Professor & Vice President, Public Health Foundation of India, Gurgaon, India,  
5 Email: [dprabhakaran@ccdcindia.org](mailto:dprabhakaran@ccdcindia.org)  
6

7 \*Corresponding Author  
8

9  
10 **Address for correspondence:**

11 Ambuj Roy, MD, DM  
12 Professor of Cardiology,  
13 All India Institute of Medical Sciences  
14 New Delhi, India- 110029.  
15 Email: [drambujroy@gmail.com](mailto:drambujroy@gmail.com)  
16 Phone: 91-9869393945;  
17 Fax: 91-11-26588663  
18  
19

20 Word count: 2869  
21

22 **Competing Interests:** Nothing to declare  
23

24  
25 **Funding:** The study was funded by the Indian Council of Medical Research, New Delhi, India  
26  
27

28 **Contributorship Statement:**  
29

30  
31 Authors Reddy, Tandon, Prabhakaran, Anand Krishnan, Shukla, Sharma and Roy conceptualized and  
32 designed the study and revised the manuscript. Reddy, Prabhakaran, Anand Krishnan, Praveen,  
33 Amarchand and Roy were involved in execution of the study in the field. Praveen, Prabhakaran and  
34 Roy drafted and revised the manuscript. Kondal and Singh did the data analysis. Lakshmy and Gupta  
35 coordinated the biochemical analysis and interpreted the data  
36  
37  
38  
39  
40  
41  
42

43 **Data Sharing Statement:**  
44

45  
46 I, the corresponding author of the manuscript, on behalf of all the other authors here by agree to  
47 share the study data and additional explanatory materials to fellow researchers.  
48  
49

50  
51 **Key Words:** Hypertension; Pre-Hypertension; Secular trends; Cardiovascular disease risk factors;  
52 India  
53  
54  
55  
56  
57  
58  
59  
60

**Abstract**

**Background & Objectives:** Despite being one of the leading risk factors of cardiovascular mortality, there is limited data on changes in hypertension burden and management from India. This study evaluates trend in the prevalence, awareness, treatment and control of hypertension in the urban and rural areas of India's National Capital Region (NCR).

**Design & setting:** Two representative cross-sectional surveys were conducted in urban and rural areas [Survey1 (1991-1994); Survey 2 (2010-2012)] of NCR using similar methodologies.

**Participants:** A total of 3,048 (mean age: 46.8± 9.0; 52.3 % women) and 2,052 (mean age: 46.5±8.4; 54.2 % women) subjects of urban areas and 2,487 (mean age: 46.6±8.8; 57.0% women) and 1,917 (mean age: 46.5±8.5; 51.3 % women) subjects of rural areas were included in Survey 1 & 2 respectively.

**Primary and secondary outcome measures:** Hypertension was defined as per Joint National Committee VII guidelines. Structure questionnaire was used to measure the awareness and treatment status of hypertension. A mean SBP < 140 mm Hg and DBP < 90 mm Hg was defined as control of hypertension among the participants with hypertension.

**Results:** The age and sex standardised prevalence of hypertension increased from 23.0% to 42.2% (p<0.001) and 11.2% to 28.9% (p<0.001) in urban and rural NCR respectively. In both surveys, those with high education, alcohol use, obesity and high fasting blood glucose were at a higher risk for hypertension. However, the change in hypertension prevalence between the surveys was independent of these risk factors [adjusted odds ratio (95% C.I): urban [2.3 (2.0, 2.7)]; rural [3.1 (2.4, 4.0)]. Overall there was no improvement in awareness, treatment and control rates of hypertension in the population.

1  
2  
3 **Conclusion:** There was marked increase in prevalence of hypertension over two decades with no  
4  
5 improvement in management.  
6  
7

#### 8 **Strengths of the study**

- 9  
10  
11 • One of the first studies to report the trends in the population burden and management of  
12 hypertension from the low and middle income countries
- 13  
14  
15 • The study surveyed representative samples from the same population using similar  
16  
17 methodologies and was adequately powered to compare hypertension burden at two time  
18  
19 periods  
20  
21  
22

#### 23 **Limitations of the study**

- 24  
25  
26 • The Instrument used for blood pressure measurement was different in the two studies. This  
27  
28 was inevitable since the apparatus used in first survey was unavailable at the time of the  
29  
30 next survey.  
31  
32
- 33  
34 • Behavioural risk factors like diet and physical activity were not assessed during the first  
35  
36 survey and therefore not reported and they could account for difference in blood pressure  
37  
38 levels as discussed.  
39  
40
- 41  
42 • The study being restricted to urban and rural NCR of Delhi, may not be generalizable across  
43  
44 India.  
45  
46  
47  
48  
49  
50  
51  
52  
53  
54  
55  
56  
57  
58  
59  
60

## Introduction

High blood pressure (HBP) is the single largest risk factor for disease burden worldwide. In India, HBP has now emerged as a leading risk factor for mortality [1]. Several studies over the years have shown increasing prevalence of hypertension in India [2–4]. Kearney et al in their paper predicted that the burden of hypertension in India is expected to almost double from 118 million in 2000 to 213.5 million by 2025 [5]. A recent systematic analysis suggested high prevalence with poor awareness, treatment and control of hypertension in India [6].

At the population level the effect of rise in blood pressure is continuous with increasing cardiovascular risk with rise of blood pressure above 115/75[7] mmHg. According to the Global Burden of Disease-2015 analysis, the estimated rate of annual deaths associated with SBP of at least 110 to 115 mm Hg between 1990 and 2015 has increased from 135.6 to 145.2 per 100 000 persons[8]. However, data from India on trends of population blood pressure distribution, hypertension prevalence, awareness, treatment and control in representative population over time is scarce due to absence of active surveillance. This data is important to formulate informed policy as high blood pressure is one of the key targets to reduce premature mortality due to cardiovascular diseases (CVD) set by World Health Organisation (WHO) and the Indian government[9,10].

We conducted two surveys on prevalence of cardiovascular risk factors between April 1991 and June 1994 (Survey 1) and August 2010 and January 2012 (Survey 2) in National Capital Region (NCR) of India (urban Delhi and adjoining rural Haryana). These surveys enabled us to estimate the changes in blood pressure prevalence and management in this population over this time period.

## Methods

Study population and sample size:

1  
2  
3 The two cross-sectional surveys were carried out in adults aged 35-64 years using a multistage  
4 cluster random sampling method in the urban area and a simple random sampling method in the  
5 rural area to assess the prevalence of coronary artery disease (CAD) and its risk factors. The sample  
6 size was calculated based on estimated prevalence of CAD in the population. The details of sample  
7 size calculation were published elsewhere [11]. Based on this 5535 participants were recruited for  
8 survey 1(urban-3048; rural-2487) and 3969 were recruited for survey 2 (urban-2052; rural-1917). In  
9 both surveys, all eligible individuals from the primary sampling unit (household) were approached  
10 for their consent to participate in the survey.  
11  
12  
13  
14  
15  
16  
17  
18  
19

#### 20 Data collection:

21  
22 Both the surveys got ethical clearance from institutional ethics committees of the participating  
23 institutions. The data were collected through household visits using a standardized questionnaire.  
24 Anthropometric and biochemical data were collected through physician led medical camps using  
25 standardized equipments and methods. In survey 1, blood pressure was measured using a random  
26 zero sphygmomanometer while in survey 2 an automated blood pressure machine [OMRON (HEM-  
27 7080)] was used. In both surveys, two blood pressure readings were recorded in sitting position, five  
28 minutes apart. If the difference between the two readings was more than 10mmHg, a third  
29 measurement was taken. The mean of the last two measurements were taken for final analysis.  
30  
31  
32  
33  
34  
35  
36  
37  
38  
39  
40  
41

#### 42 Operational definitions:

43  
44 Pre hypertension and hypertension were defined using the Joint National Committee VII criteria[12]  
45 (systolic blood pressure (SBP) 120-139 mm Hg and/or diastolic blood pressure (DBP) 80-89 mm Hg  
46 for pre hypertension and SBP $\geq$  140 mm Hg and/or DBP  $\geq$  90 mm Hg or on blood pressure lowering  
47 medication for hypertension). Those who were diagnosed with hypertension were further classified  
48 in to stage I (SBP140-159 mm Hg and/or DBP 90-99 mm Hg) and stage II (SBP $\geq$  160 mm Hg and/or  
49 DBP  $\geq$  100mm Hg).  
50  
51  
52  
53  
54  
55  
56  
57  
58  
59  
60



1  
2  
3 Hypertension awareness, treatment, and control were analysed in hypertensive participants based  
4 on questionnaires and blood pressure measurements. Among the hypertensive participants, self-  
5 report of any previous clinical diagnosis of hypertension was defined as awareness of hypertension.  
6  
7 Self- reported anti-hypertension medication use was defined as on treatment and a mean SBP < 140  
8 mm Hg and DBP < 90 mm Hg was defined as control of hypertension among the participants with  
9 hypertension.  
10  
11  
12  
13  
14  
15

### 16 17 **Statistical analysis**

18  
19 STATA 12.1 (STATA Corporation, College Station, TX, USA) was used for the statistical analysis.  
20  
21 Prevalence of hypertension along with their standard errors and ratios between Survey 1 and Survey  
22 2 and the awareness, treatment and control levels during Survey 1 and 2 are presented. The age and  
23 gender adjusted prevalence of hypertension was calculated using Indian census data for 2011 as  
24 standard population. Hypertension prevalence was analysed by selected demographic and health  
25 characteristics: gender, place of residence (urban/rural), age category (35-44, 45-54, 55-64),  
26 educational status, Body Mass Index (BMI), blood glucose level and alcohol use. Educational status  
27 was defined as follows: Low (illiterate to primary level), Medium (middle to high school) High (higher  
28 secondary and above). World Health Organisation cut offs were used to categorise BMI values  
29 (normal- BMI<25 kg/m<sup>2</sup>, overweight- BMI 25-<30 kg/m<sup>2</sup>, obesity-BMI≥30 kg/m<sup>2</sup>) and abdominal  
30 obesity [Waist to Hip Ratio (WHR) >0.90 for men and >0.85 for women]. Blood glucose levels were  
31 categorised as normoglycemic (fasting plasma glucose (FPG) < 100 mg/dl), impaired fasting glucose  
32 (FPG 100- <126mg/dl); and diabetes (FPG≥ 126 mg/dl). Alcohol use was defined as any use in the last  
33 twelve months of any alcohol product. The difference in proportions between the surveys was  
34 evaluated using chi square test. Any p value <0.05 was considered statistically significant. Logistic  
35 regression models were constructed for urban and rural populations separately defining prevalence  
36 of hypertension as outcome variable and time period (Survey2 vs Survey 1) as exposure variables.  
37 We added covariates as categorical variables (age groups, gender, obesity, waist-hip-ratio, diabetes  
38  
39  
40  
41  
42  
43  
44  
45  
46  
47  
48  
49  
50  
51  
52  
53  
54  
55  
56  
57  
58  
59  
60

1  
2  
3 and alcohol use), stepwise to the logistic regression model. Adjusted odds ratios and 95% CIs were  
4  
5 reported. We also assessed the interaction between time (Survey 1; Survey 2) and other covariates  
6  
7 mentioned above using likelihood test. If the interaction was found to be significant, then stratified  
8  
9 analysis was reported.  
10

## 11 12 **Results**

13  
14  
15 A total of 3,048 (mean (SD) age: 46.8 (9.0) years; 52.3 % females) and 2,052 (mean (SD) age: 46.5  
16  
17 (8.4) years; 54.2 % females) subjects of urban areas and 2,487 (mean (SD) age: 46.6 (8.8) years; 57.0  
18  
19 % females) and 1,917 (mean (SD) age: 46.5 (8.5) years; 51.3 % females) subjects of rural areas were  
20  
21 recruited in Survey 1 & 2 respectively. Ninety-nine% of the participants in both surveys had their  
22  
23 blood pressure measured. Among those surveyed, 95% and 78% in Survey 1 and Survey 2  
24  
25 respectively of the urban sample and 51.0% and 64.9% in Survey 1 and Survey 2 respectively of the  
26  
27 rural sample agreed to provide a fasting blood sample for biochemical analysis.  
28  
29

30  
31 The prevalence of hypertension increased from 23.0% to 42.2% and 11.2% to 28.9% in urban and  
32  
33 rural NCR of Delhi respectively between the two surveys. The increase in prevalence was by 83% in  
34  
35 urban NCR and 158% in rural NCR. The rise in prevalence was more in men with a rise of 94% and  
36  
37 73% in urban areas and 191% and 125% in rural areas in men and women respectively (Table 1). The  
38  
39 age specific prevalence of hypertension revealed an increase in prevalence at all ages except in the  
40  
41 highest age group (55-64 years) of urban men and women. The rise in age specific prevalence was  
42  
43 highest in the youngest age group (35-44) with a rise in prevalence of 153%, 115%, 239% and 336%,  
44  
45 in urban men, urban women, rural men and rural women respectively.  
46  
47

48  
49 The distribution of blood pressure in the population (excluding those on anti-hypertensive therapy),  
50  
51 changed significantly over the years. In survey 2, there was lesser proportion of the people with  
52  
53 optimum blood pressure values (BP <120/80mmhg) and a higher proportion of individuals with pre-  
54  
55

1  
2  
3 hypertension, Stage I and Stage II hypertension (Figure 1) compared to survey 1. This change of  
4 distribution was similar across men and women in NCR and also both in urban and rural areas.  
5  
6

7  
8 The prevalence of hypertension was stratified by other known risk factors associated with blood  
9 pressure (Figure 2). Hypertension prevalence increased with increasing BMI and education  
10 categories in both urban and rural population (Figure 2). The prevalence was highest among those  
11 with diabetes followed by those with impaired fasting blood glucose in both urban and rural areas  
12 (Figure 2). Alcohol users had higher prevalence of hypertension (Figure 2). The prevalence increased  
13 in each of these categories in survey 2 as compared to Survey 1.  
14  
15  
16  
17  
18  
19

20  
21 The distribution of risk factors in those with and without hypertension in urban and rural areas is as  
22 in supplementary table-1. The prevalence of alcohol use, obesity, abdominal obesity and diabetes  
23 increased significantly among those with hypertension in survey 2 compared to survey 1. The  
24 relative increase in hypertension prevalence between the surveys was modelled as if there was no  
25 change in these risk factors and the demographic profile between the surveys. The increased odds  
26 ratio of hypertension in Survey 2 as compared to Survey 1 persisted even after adjusting for these  
27 factors. On analysis, a significant interaction between time and age was observed. The age stratified  
28 models suggested higher odds of change in hypertension prevalence among the youngest age group  
29 in both urban and rural areas (Table-2).  
30  
31  
32  
33  
34  
35  
36  
37  
38  
39  
40  
41

42 There was no change in the overall awareness, treatment and control rates of hypertension between  
43 the two surveys in the NCR (Table 3). When stratified by gender the awareness, treatment and  
44 control rates of hypertension in men decreased in the second survey while awareness and treatment  
45 but not control rates improved in women. The overall rates of all three parameters were higher in  
46 woman than men. Similarly in urban areas there was no change in the overall awareness, treatment  
47 and control rates of hypertension between the two surveys though all three parameters decreased  
48 in men with no significant change in women with higher overall rates in women. In rural NCR the  
49  
50  
51  
52  
53  
54  
55  
56  
57  
58  
59  
60

1  
2  
3 overall awareness, treatment and control rates of hypertension improved between the two surveys.  
4  
5 This was seen in men and women except for control rates in men which did not improve. However,  
6  
7 though all three rates improved in rural areas, the overall awareness (46.4% vs26.8%), treatment  
8  
9 (40.0vs 20.4%) and control rates (15.9vs 8.0%) in rural areas remained much lower than in urban  
10  
11 areas.  
12  
13  
14  
15  
16  
17  
18  
19  
20  
21  
22  
23  
24  
25  
26  
27  
28  
29  
30  
31  
32  
33  
34  
35  
36  
37  
38  
39  
40  
41  
42  
43  
44  
45  
46  
47  
48  
49  
50  
51  
52  
53  
54  
55  
56  
57  
58  
59  
60

For peer review only

Table 1: Age & sex standardized and age-specific prevalence of hypertension: Survey 1 and Survey 2

|              | Rural          |      |      |                |      |      |                    |                 | Urban          |      |      |                |      |      |                    |                 |
|--------------|----------------|------|------|----------------|------|------|--------------------|-----------------|----------------|------|------|----------------|------|------|--------------------|-----------------|
|              | Survey 1       |      |      | Survey 2       |      |      | P Value-Difference | Ratio (95% C.I) | Survey 1       |      |      | Survey 2       |      |      | P Value-Difference | Ratio           |
| N            | Prevalence (%) | SE   | N    | Prevalence (%) | SE   | N    |                    |                 | Prevalence (%) | SE   | N    | Prevalence (%) | SE   |      |                    |                 |
| Total        | 2,469          | 11.2 | 0.01 | 1914           | 28.9 | 1    | <0.001             | 2.6 (2.3, 2.9)  | 3,041          | 23   | 0.01 | 2026           | 42.2 | 1.1  | <0.001             | 1.8 (1.6, 1.9)  |
| Men          | 1,065          | 12.2 | 0.01 | 981            | 32.6 | 1.5  | <0.001             | 2.7 (2.2, 3.3)  | 1,451          | 22.3 | 0.01 | 924            | 43.3 | 1.6  | <0.001             | 1.9 (1.8, 2.3)  |
| Women        | 1,404          | 10.2 | 0.01 | 933            | 25.2 | 1.4  | <0.001             | 2.5 (2.4, 3.6)  | 1,590          | 23.8 | 0.01 | 1102           | 41.1 | 1.4  | <0.001             | 1.7 (1.5, 2.0)  |
| <b>Men</b>   |                |      |      |                |      |      |                    |                 |                |      |      |                |      |      |                    |                 |
| 35-44        | 441            | 8.1  | 0.01 | 459            | 27.4 | 0.02 | <0.001             | 3.4 (2.4, 4.8)  | 646            | 13.4 | 0.01 | 434            | 33.9 | 0.02 | <0.001             | 2.5 (2.0, 3.3)  |
| 45-54        | 318            | 12.2 | 0.02 | 315            | 36.1 | 0.03 | <0.001             | 3.0 (2.1, 4.1)  | 432            | 21.6 | 0.02 | 299            | 47.9 | 0.03 | <0.001             | 2.2 (1.8, 2.8)  |
| 55-64        | 306            | 21.6 | 0.02 | 207            | 38.6 | 0.03 | <0.001             | 1.8 (1.4, 2.4)  | 373            | 34.5 | 0.03 | 191            | 42.5 | 0.02 | NS                 | 1.2 (1.0, 1.6)  |
| <b>Women</b> |                |      |      |                |      |      |                    |                 |                |      |      |                |      |      |                    |                 |
| 35-44        | 667            | 4.3  | 0.01 | 433            | 18.7 | 0.02 | <0.001             | 4.4 (3.1, 6.9)  | 723            | 12.8 | 0.01 | 521            | 27.6 | 0.02 | <0.001             | 2.2 (1.8, 2.8)  |
| 45-54        | 438            | 9.4  | 0.01 | 277            | 28.5 | 0.03 | 0.001              | 3.0 (2.2, 4.4)  | 450            | 25.9 | 0.02 | 321            | 46.9 | 0.03 | <0.001             | 1.8 (1.5, 2.2)  |
| 55-64        | 299            | 23.1 | 0.02 | 223            | 33.3 | 0.03 | 0.011              | 1.4 (1.1, 1.9)  | 417            | 57.6 | 0.04 | 260            | 59.8 | 0.03 | NS                 | 1.0 (0.99, 1.6) |

N- Sample size; SE- Standard Error; Ratio-Survey2/Survey1: NS-not statistically significant

1  
2  
3  
4  
5  
6  
7  
8  
9  
10  
11  
12  
13  
14  
15  
16  
17  
18  
19  
20  
21  
22  
23  
24  
25  
26  
27  
28  
29  
30  
31  
32  
33  
34  
35  
36  
37  
38  
39  
40  
41  
42  
43  
44  
45  
46  
47  
48  
49

|                                                                                                                                                                                                                                                                                                                                                                                                             | Odds ratio (95% CI) |                |
|-------------------------------------------------------------------------------------------------------------------------------------------------------------------------------------------------------------------------------------------------------------------------------------------------------------------------------------------------------------------------------------------------------------|---------------------|----------------|
|                                                                                                                                                                                                                                                                                                                                                                                                             | Rural               | Urban          |
| Unadjusted                                                                                                                                                                                                                                                                                                                                                                                                  | 3.2 (2.7, 3.8)      | 2.3 (2.0, 2.6) |
| Model 1: Adjusted for age                                                                                                                                                                                                                                                                                                                                                                                   | 3.4 (2.9, 4.0)      | 2.6 (2.3, 2.9) |
| Model 2: Adjusted for age and gender                                                                                                                                                                                                                                                                                                                                                                        | 3.3 (2.8, 3.9)      | 2.6 (2.3, 2.9) |
| Model 3: Adjusted for age, gender and obesity                                                                                                                                                                                                                                                                                                                                                               | 3.1 (2.6, 3.6)      | 2.6 (2.2, 2.9) |
| Model 4: Adjusted for age, gender and WHR                                                                                                                                                                                                                                                                                                                                                                   | 3.1 (2.6,3.6)       | 2.4 (2.1,2.8)  |
| Model 5: Adjusted for age, gender, obesity and WHR                                                                                                                                                                                                                                                                                                                                                          | 2.9 (2.4,3.4)       | 2.4 (2.1,2.8)  |
| Model 6: Adjusted for age, gender, obesity, WHR and diabetes                                                                                                                                                                                                                                                                                                                                                | 3.3(2.6,4.1)        | 2.4 (2.1,2.7)  |
| Model 7: Adjusted for age, gender, obesity, WHR, diabetes and alcohol use                                                                                                                                                                                                                                                                                                                                   | 3.1 (2.4, 4.0)      | 2.3 (2.0,2.7)  |
| Model 8: Model 7 stratified by age groups                                                                                                                                                                                                                                                                                                                                                                   |                     |                |
| Age 35-44 years                                                                                                                                                                                                                                                                                                                                                                                             | 5.0(3.0,8.4)        | 2.7(2.1,3.4)   |
| Age 45-54 years                                                                                                                                                                                                                                                                                                                                                                                             | 1.6(1.2,2.1)        | 2.1(1.6,2.6)   |
| Age 55-64 years                                                                                                                                                                                                                                                                                                                                                                                             | 2.1(1.6,2.9)        | 2.6(1.9,3.4)   |
| <i>Obesity- BMI <math>\geq 30</math> Kg/m<sup>2</sup>; Diabetes- Fasting Plasma Glucose (FPG) <math>\geq 126</math> mg/dl or on medication; Abdominal obesity-Waist-hip-ratio <math>&gt;0.90</math> for men and <math>&gt;0.85</math> for women; p-value for interaction between time and age (rural) <math>p=0.0001</math>; p-value for interaction between time and age (urban) <math>p=0.0008</math></i> |                     |                |

**Table-3: Hypertension awareness, treatment and control among hypertensive population in NCR of Delhi: Survey 1 and Survey 2**

|              | Awareness    |              |         | Treatment    |              |         | Control      |              |         |
|--------------|--------------|--------------|---------|--------------|--------------|---------|--------------|--------------|---------|
|              | Survey 1 (%) | Survey 2 (%) | P value | Survey 1 (%) | Survey 2 (%) | P value | Survey 1 (%) | Survey 2 (%) | P value |
| <b>Total</b> | 37.5         | 38.7         | NS      | 32.0         | 32.3         | NS      | 14.4         | 12.8         | NS      |
| Men          | 33.1         | 26.8         | 0.02    | 28.3         | 21.1         | 0.01    | 13.1         | 7.1          | 0.01    |
| Women        | 41.5         | 51.1         | 0.001   | 35.4         | 43.9         | 0.001   | 15.6         | 18.7         | NS      |
| <b>Urban</b> |              |              |         |              |              |         |              |              |         |
| Total        | 49.0         | 46.4         | NS      | 41.6         | 40.0         | NS      | 19.0         | 15.9         | NS      |
| Men          | 44.3         | 34.7         | 0.01    | 37.8         | 29.2         | 0.01    | 17.6         | 10.7         | 0.01    |
| Women        | 53.2         | 56.9         | NS      | 45.0         | 49.6         | NS      | 20.2         | 20.4         | NS      |
| <b>Rural</b> |              |              |         |              |              |         |              |              |         |
| Total        | 7.2          | 26.8         | 0.001   | 6.8          | 20.4         | 0.01    | 2.5          | 8.0          | 0.001   |
| Men          | 5.7          | 17.0         | 0.001   | 5.0          | 11.0         | 0.04    | 2.1          | 2.5          | NS      |
| Women        | 8.7          | 40           | <0.001  | 8.7          | 33.2         | <0.001  | 2.9          | 15.3         | <0.001  |

NS- not statistically significant

## Discussion

The repeat survey in NCR of Delhi done after two decades shows (1) continued gradient in urban rural prevalence of hypertension (2) Significant increases in prevalence of hypertension both in urban and rural areas with a higher increase in rural areas,(3) highest increase in prevalence of hypertension in the youngest age group (35-44 years) surveyed, (4) a rightward shift in the distribution of blood pressure in both urban and rural populations with fewer individuals with optimum blood pressure (<120/80), (5)strong relationship between hypertension and BMI, education level, fasting glucose levels and alcohol use, however, even after adjusting for all these predictor variables the odds of hypertension prevalence remained higher in the second survey (6) no change in overall awareness , treatment and control rates of hypertension in NCR

Prevalence of hypertension has been consistently increasing over the years; however, most reviews from India have included old studies. Recent repeat surveys done in other cities have shown varying results. A study from Jaipur revealed no significant change in hypertension prevalence over 2 decades from 1990 with a decrease in mean systolic blood pressure during this period [13]. A repeat survey from Chennai showed rise in self-reported prevalence in hypertension in low and middle income groups [14]. However, these studies included only urban subjects and utilised convenience sampling and thus were not representative of the population. Our study done on a representative urban and rural sample revealed that the prevalence of hypertension increased in urban and rural areas with a higher rate of rise in the rural population. A recent systematic review of hypertension found a prevalence of 27.6% in rural India though it was only 16.7% in rural Northern India [6] which was at variance with our findings. However, more recent studies from North India have suggested prevalence of 22% and 32%in similar age groups, which is close to the prevalence in our study of 28.9% and those from other parts of rural India[15][16].



1  
2  
3 The age stratified prevalence showed increase in all age groups except the oldest in urban areas,  
4  
5 with the highest rate of rise of hypertension in the youngest age group (35-44 years). Indirect  
6  
7 evidence of high burden of risk factors in young comes from occurrence of cardiovascular diseases at  
8  
9 younger age in South Asians as compared the Caucasians [4]. A study among the young individuals  
10  
11 (20-30 years) from South India revealed a very high burden of 45.2% of pre-hypertension in the  
12  
13 population [17]. However, the rapid rise of the burden of hypertension in young in last two decades  
14  
15 has probably been demonstrated for the first time in this study and is worrisome and calls for urgent  
16  
17 action to prevent further burden of pre-mature CVD in Indians.  
18  
19

20  
21 The other important finding was the worsening of population blood pressure levels over two  
22  
23 decades with a significantly lower proportion of the population having optimum blood pressure and  
24  
25 more of them having pre-hypertension and hypertension. Small shifts in population blood pressure  
26  
27 levels is known to lead to large increases in the burden of CVD in the community [18] and thus this  
28  
29 also portends future worsening of CVD epidemic in India. It calls for population level intervention  
30  
31 like advocacy for salt reduction, weight reduction and increase physical activity. The prevalence of  
32  
33 hypertension was expectantly dependant on BMI and fasting glucose levels with higher rates among  
34  
35 overweight and obese and those with impaired fasting glucose and diabetes. This finding is  
36  
37 consistent across most studies in India and abroad [19–21]. The association of hypertension in India  
38  
39 with education is variable. A recent large cohort study from South Asia reported higher prevalence  
40  
41 among more educated [22]. Some have reported reverse gradient with education [23] while others  
42  
43 have reported no relationship[24,25].Alcohol use was associated with higher prevalence of  
44  
45 hypertension as seen in other studies[26]. Limited data from South Asia suggests higher blood  
46  
47 pressure levels in alcohol users [27]and also higher probability of MI in them than alcohol  
48  
49 abstainers[28]unlike other population groups. Interestingly, the rise in prevalence of hypertension in  
50  
51 Survey 2 was significant even after adjusting for these factors. This could be due to other  
52  
53  
54  
55  
56  
57  
58  
59  
60

1  
2  
3 unmeasured lifestyle factors known to be associated with high blood pressure like diet, physical  
4 activity, stress etc, data for which was not available for both studies.  
5  
6  
7

8 The prevalence, awareness and control rates for hypertension were overall sub-optimal with no  
9 improvement between the 2 surveys. The rates of awareness, treatment and control of hypertension  
10 were comparable to the pooled estimates reported in systematic reviews with better rates in urban  
11 areas as compared to rural areas [2,6]. Additionally these rates were better in women as compared  
12 to men, as has been reported consistently in large studies from India and abroad[29,30]. This is  
13 related to greater health seeking behaviour in women [30]. This study additionally provided insights  
14 into the change in these rates over the last two decades which is not available from India earlier. The  
15 disturbing fact was that despite rising prevalence of hypertension there was no improvement in  
16 these rates with all three rates worsening in men with improvement in awareness, treatment but  
17 not control rates in women. When analysed by site and gender all rates except control rates in men  
18 improved in rural areas while in urban areas they worsened in men and remained unchanged in  
19 women. However, the overall rates in rural areas were still much lower than urban areas and the  
20 improvement in rural areas could be attributed to low rates in the first survey.  
21  
22  
23  
24  
25  
26  
27  
28  
29  
30  
31  
32  
33  
34  
35  
36

### 37 **Strengths and limitations**

38  
39 The strengths of this study is that it surveyed population representative sample in the same  
40 population using similar methodologies and was adequately powered, thus providing opportunity to  
41 compare hypertension statistics at two time periods. Such temporal trend was not available from  
42 urban and rural areas of India earlier. One of the limitations of this study is that the apparatus used  
43 for blood pressure measurement was different in the two studies. This was inevitable since the  
44 apparatus used in first survey was unavailable at the time of the next survey. The two apparatus  
45 have marginal difference and if anything the current method of automated blood pressure monitors  
46 is known to underestimate blood pressure [31]and thus the prevalence and shift in blood pressure  
47  
48  
49  
50  
51  
52  
53  
54  
55  
56  
57  
58  
59  
60

1  
2  
3 levels in the population would only be higher. The other limitation is that behavioural risk factors like  
4  
5 diet and physical activity were not assessed during the first survey and therefore not reported and  
6  
7 they could account for difference in blood pressure levels as discussed. In addition macro level  
8  
9 changes in the population like socio-economic transition, urbanisation, policy etc. are not accounted  
10  
11 for in our study. The study being restricted to urban and rural NCR of Delhi, may not be generalizable  
12  
13 across India though similar prevalence rates have been reported across the country.  
14  
15

### 16 17 **Conclusions**

18  
19 This two time survey of NCR of Delhi shows marked increase in prevalence of hypertension in the  
20  
21 last two decades both in rural and urban areas with higher rates of increase in younger age. This was  
22  
23 also associated with fewer individuals with optimum blood pressure and more with pre-  
24  
25 hypertension and hypertension. This calls for urgent population and high risk approach to lower  
26  
27 blood pressure in the community as the overall awareness, treatment and control levels showed no  
28  
29 improvement over this time frame.  
30  
31

### 32 33 **Figure Legend**

34  
35  
36 Figure-1: Distribution of BP categories (%) in untreated population of NCR of Delhi: A) Urban Men;  
37  
38 (B) Urban Women; (C) Rural Men; (D) Rural Women  
39  
40

41  
42 Figure-2: Prevalence (%) of hypertension stratified by risk factors: (A) Education status; (B) Body  
43  
44 Mass Index(BMI); (C) Fasting Plasma Glucose; (D) Alcohol Use  
45  
46  
47  
48  
49  
50  
51  
52  
53  
54  
55  
56  
57  
58  
59  
60

## References

- 1 Lim SS, Vos T, Flaxman AD, *et al*. A comparative risk assessment of burden of disease and injury attributable to 67 risk factors and risk factor clusters in 21 regions, 1990-2010: a systematic analysis for the Global Burden of Disease Study 2010. *Lancet* 2012;**380**:2224–60. doi:10.1016/S0140-6736(12)61766-8
- 2 Devi P, Rao M, Sigamani A, *et al*. Prevalence, risk factors and awareness of hypertension in India: a systematic review. *J Hum Hypertens* 2013;**27**:281–7. doi:10.1038/jhh.2012.33
- 3 Gupta R. Trends in hypertension epidemiology in India. *J Hum Hypertens* 2004;**18**:73–8. doi:10.1038/sj.jhh.1001633
- 4 Prabhakaran D, Jeemon P, Roy A. Cardiovascular Diseases in India. *Circulation* 2016;**133**:1605–20. doi:10.1161/CIRCULATIONAHA.114.008729
- 5 Kearney PM, Whelton M, Reynolds K, *et al*. Global burden of hypertension: analysis of worldwide data. *Lancet*; **365**:217–23. doi:10.1016/S0140-6736(05)17741-1
- 6 Anchala R, Kannuri NK, Pant H, *et al*. Hypertension in India: a systematic review and meta-analysis of prevalence, awareness, and control of hypertension. *J Hypertens* 2014;**32**:1170–7. doi:10.1097/HJH.0000000000000146
- 7 Lewington S, Clarke R, Qizilbash N, *et al*. Age-specific relevance of usual blood pressure to vascular mortality: a meta-analysis of individual data for one million adults in 61 prospective studies. *Lancet (London, England)* 2002;**360**:1903–13.
- 8 Forouzanfar MH, Liu P, Roth GA, *et al*. Global Burden of Hypertension and Systolic Blood Pressure of at Least 110 to 115 mm Hg, 1990-2015. *JAMA* 2017;**317**:165. doi:10.1001/jama.2016.19043

- 1  
2  
3 9 United Nations. UN General Assembly resolution on the prevention and control of non  
4 communicable diseases. 2010. [www.un.org](http://www.un.org) (accessed 5 Mar2014).  
5  
6  
7  
8 10 World Health Organization. NCD Global Monitoring Framework.  
9  
10 2013. [http://www.who.int/nmh/global\\_monitoring\\_framework](http://www.who.int/nmh/global_monitoring_framework) (accessed 5 Mar2014).  
11  
12  
13 11 Prabhakaran D, A Roy, Praveen PA, Ritvik A, Singh K, Kondal D, Ruby G, Lakshmy R, N Tandon,  
14 Reddy K S AK. Twenty year trend in the prevalence of cardiovascular disease risk factors in  
15 the Urban and Rural areas of National Capital Region (NCR), India. *Glob Heart* 2017(in press).  
16  
17  
18  
19  
20 12 Chobanian A V, Bakris GL, Black HR, *et al*. The Seventh Report of the Joint National  
21 Committee on Prevention, Detection, Evaluation, and Treatment of High Blood Pressure: the  
22 JNC 7 report. *JAMA* 2003;**289**:2560–72. doi:10.1001/jama.289.19.2560  
23  
24  
25  
26  
27  
28 13 Gupta R, Guptha S, Gupta VP, *et al*. Twenty-year trends in cardiovascular risk factors in India  
29 and influence of educational status. *Eur J Prev Cardiol* 2012;**19**:1258–71.  
30  
31  
32 doi:10.1177/1741826711424567  
33  
34  
35 14 Deepa M, Anjana RM, Manjula D, *et al*. Convergence of prevalence rates of diabetes and  
36 cardiometabolic risk factors in middle and low income groups in urban India: 10-year follow-  
37 up of the Chennai Urban Population Study. *J Diabetes Sci Technol* 2011;**5**:918–  
38  
39  
40  
41  
42 27. [http://www.pubmedcentral.nih.gov/articlerender.fcgi?artid=3192599&tool=pmcentrez&](http://www.pubmedcentral.nih.gov/articlerender.fcgi?artid=3192599&tool=pmcentrez&rendertype=abstract)  
43  
44 endertype=abstract (accessed 30 May2016).  
45  
46  
47 15 Kishore J, Gupta N, Kohli C, *et al*. Prevalence of Hypertension and Determination of Its Risk  
48 Factors in Rural Delhi. *Int J Hypertens* 2016;**2016**:7962595. doi:10.1155/2016/7962595  
49  
50  
51  
52 16 Bansal SK, Saxena V, Kandpal SD, *et al*. The prevalence of hypertension and hypertension risk  
53 factors in a rural Indian community: A prospective door-to-door study. *J Cardiovasc Dis Res*  
54  
55  
56 2012;**3**:117–23. doi:10.4103/0975-3583.95365  
57  
58  
59  
60

- 1  
2  
3 17 Kini S, Kamath VG, Kulkarni MM, *et al.* Pre-Hypertension among Young Adults (20-30 Years) in  
4 Coastal Villages of Udupi District in Southern India: An Alarming Scenario. *PLoS One*  
5  
6 2016;**11**:e0154538. doi:10.1371/journal.pone.0154538  
7  
8  
9  
10 18 Lewington S, Clarke R, Qizilbash N, *et al.* Age-specific relevance of usual blood pressure to  
11 vascular mortality: a meta-analysis of individual data for one million adults in 61 prospective  
12 studies. *Lancet* 2002;**360**:1903–13. <http://www.ncbi.nlm.nih.gov/pubmed/12493255>  
13 (accessed 2 Feb2015).  
14  
15  
16  
17  
18 19 Cutler JA, Sorlie PD, Wolz M, *et al.* Trends in hypertension prevalence, awareness, treatment,  
19 and control rates in United States adults between 1988-1994 and 1999-2004. *Hypertension*  
20 2008;**52**:818–27. doi:10.1161/HYPERTENSIONAHA.108.113357  
21  
22  
23  
24  
25  
26  
27 20 Menéndez E, Delgado E, Fernández-Vega F, *et al.* Prevalence, Diagnosis, Treatment, and  
28 Control of Hypertension in Spain. Results of the Di@bet.es Study. *Rev española Cardiol*  
29 (English ed) 2016;**69**:572–8. doi:10.1016/j.rec.2015.11.034  
30  
31  
32  
33  
34 21 Bhadoria AS, Kasar PK, Toppo NA, *et al.* Prevalence of hypertension and associated  
35 cardiovascular risk factors in Central India. *J Family Community Med* 2014;**21**:29–38.  
36  
37 doi:10.4103/2230-8229.128775  
38  
39  
40  
41 22 Ali MK, Bhaskarapillai B, Shivashankar R, *et al.* Socioeconomic status and cardiovascular risk in  
42 urban South Asia: The CARRS Study. *Eur J Prev Cardiol* 2016;**23**:408–19.  
43  
44 doi:10.1177/2047487315580891  
45  
46  
47  
48 23 Reddy KS, Prabhakaran D, Jeemon P, *et al.* Educational status and cardiovascular risk profile  
49 in Indians. *Proc Natl Acad Sci U S A* 2007;**104**:16263–8. doi:10.1073/pnas.0700933104  
50  
51  
52  
53 24 Samuel P, Antonisamy B, Raghupathy P, *et al.* Socio-economic status and cardiovascular risk  
54 factors in rural and urban areas of Vellore, Tamilnadu, South India. *Int J Epidemiol*  
55  
56  
57  
58  
59  
60

- 1  
2  
3 2012;**41**:1315–27. doi:10.1093/ije/dys001  
4  
5  
6 25 Kar SS, Thakur JS, Viridi NK, *et al.* Risk factors for cardiovascular diseases: is the social gradient  
7  
8 reversing in northern India? *Natl Med J India*; **23**:206–  
9  
10 9.<http://www.ncbi.nlm.nih.gov/pubmed/21192513> (accessed 30 May2016).  
11  
12  
13 26 Huang X, Zhou Z, Liu J, *et al.* Prevalence, awareness, treatment, and control of hypertension  
14  
15 among China’s Sichuan Tibetan population: A cross-sectional study. *Clin Exp Hypertens*  
16  
17 2016;**38**:457–63. doi:10.3109/10641963.2016.1163369  
18  
19  
20 27 Roy A, Prabhakaran D, Jeemon P, *et al.* Impact of alcohol on coronary heart disease in Indian  
21  
22 men. *Atherosclerosis* 2010;**210**:531–5. doi:10.1016/j.atherosclerosis.2010.02.033  
23  
24  
25 28 Leong DP, Smyth A, Teo KK, *et al.* Patterns of alcohol consumption and myocardial infarction  
26  
27 risk: observations from 52 countries in the INTERHEART case-control study. *Circulation*  
28  
29 2014;**130**:390–8. doi:10.1161/CIRCULATIONAHA.113.007627  
30  
31  
32 29 Chow CK, Teo KK, Rangarajan S, *et al.* Prevalence, awareness, treatment, and control of  
33  
34 hypertension in rural and urban communities in high-, middle-, and low-income countries.  
35  
36 *JAMA* 2013;**310**:959–68. doi:10.1001/jama.2013.184182  
37  
38  
39 30 Irazola VE, Gutierrez L, Bloomfield G, *et al.* Hypertension Prevalence, Awareness, Treatment,  
40  
41 and Control in Selected LMIC Communities. *Glob Heart* 2016;**11**:47–59.  
42  
43 doi:10.1016/j.gheart.2015.12.008  
44  
45  
46 31 Ostchega Y, Zhang G, Sorlie P, *et al.* Blood pressure randomized methodology study  
47  
48 comparing automatic oscillometric and mercury sphygmomanometer devices: National  
49  
50 Health and Nutrition Examination Survey, 2009–2010. *Natl Health Stat Report* 2012;:1–15.  
51  
52  
53  
54  
55  
56  
57  
58  
59  
60

Figure 1 : Distribution of BP categories (%) in untreated population of NCR of Delhi

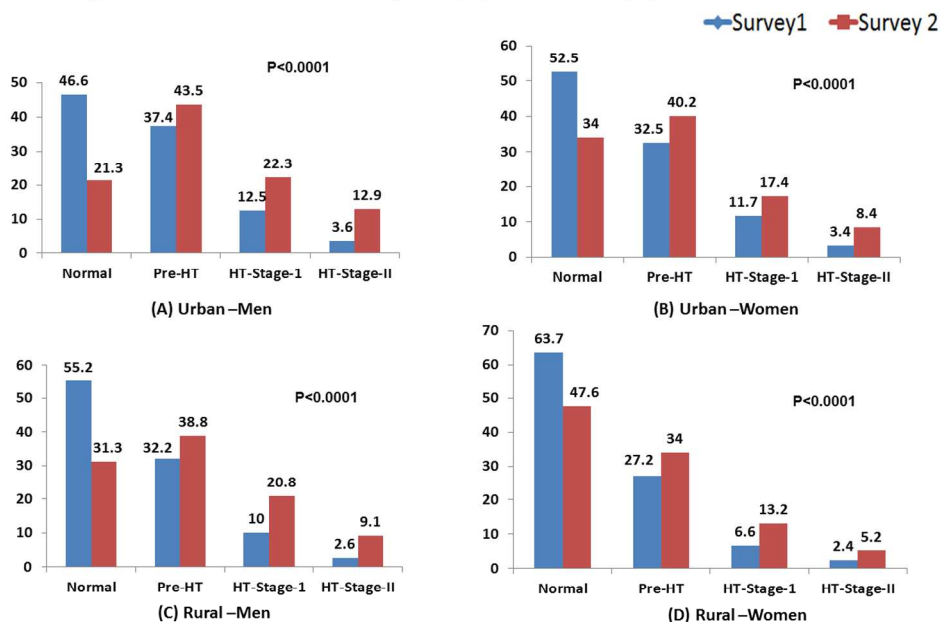

HT: Hypertension; Normal: BP<120mmHg and DBP<80 mmHg; Pre hypertension: BP 120-139 mmHg or DBP 80-89 mmHg; Hypertension Stage I: SBP 140-159or DBP 90-99; Hypertension Stage II: SBP≥160 or DBP≥ 100; S1: Survey-1; S2: Survey-2; \* Difference in distribution of blood pressure categories of Survey 1 &2

Figure-1: Distribution of BP categories (%) in untreated population of NCR of Delhi: A) Urban Men; (B) Urban Women; (C) Rural Men; (D) Rural Women

260x193mm (300 x 300 DPI)



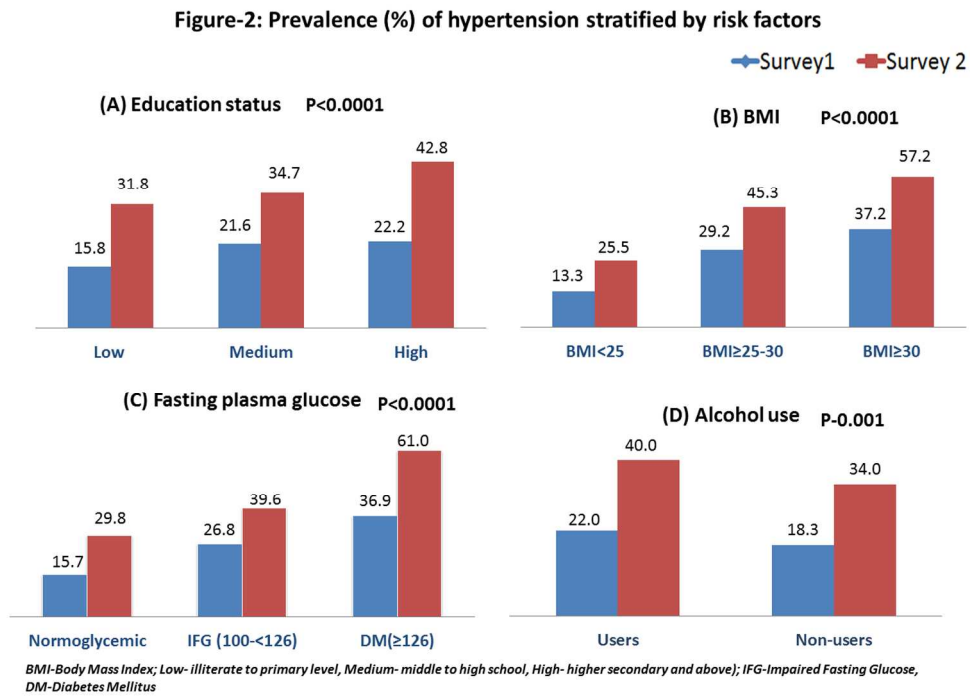

Figure-2: Prevalence (%) of hypertension stratified by risk factors: (A) Education status; (B) Body Mass Index(BMI); (C) Fasting Plasma Glucose; (D) Alcohol Use

250x178mm (300 x 300 DPI)

1  
2  
3  
4  
5  
6  
7  
8  
9  
10  
11  
12  
13  
14  
15  
16  
17  
18  
19  
20  
21  
22  
23  
24  
25  
26  
27  
28  
29  
30  
31  
32  
33  
34  
35  
36  
37  
38  
39  
40  
41  
42  
43  
44  
45  
46  
47

|                                                                                                                                                                                                                       | Urban                |                      |                      |                      | Rural                |                      |                      |                      |
|-----------------------------------------------------------------------------------------------------------------------------------------------------------------------------------------------------------------------|----------------------|----------------------|----------------------|----------------------|----------------------|----------------------|----------------------|----------------------|
|                                                                                                                                                                                                                       | Survey 1             |                      | Survey 2             |                      | Survey 1             |                      | Survey 2             |                      |
|                                                                                                                                                                                                                       | Without hypertension | With hypertension    |
| <b>Age</b><br>[Mean ± SEM]                                                                                                                                                                                            | 45.6±0.2             | 52.0±0.3             | 44.7±0.2             | 48.9±0.3             | 46.0±0.2             | 51.9±0.5             | 45.8±0.2             | 48.2±0.4             |
| <b>Gender</b><br>Women[% (95% C.I.)]                                                                                                                                                                                  | 52.0<br>(50.0, 54.0) | 53.2<br>(49.5, 56.8) | 55.5<br>(52.6, 58.3) | 52.9<br>(49.5, 56.2) | 57.8<br>(55.7, 59.8) | 49.6<br>(43.8, 55.5) | 51.3<br>(48.6, 53.9) | 42.5<br>(38.4, 46.7) |
| <b>Alcohol use (Yes)</b><br>[% (95% C.I.)]                                                                                                                                                                            | 14.0<br>(12.6, 15.5) | 14.2<br>(11.8, 17.0) | 20.8<br>(18.5, 23.2) | 26.1<br>(23.2, 29.1) | 5.5<br>(4.5, 6.7)    | 7.6<br>(4.7, 12.0)   | 30.9<br>(28.5, 33.4) | 39.8<br>(35.8, 43.9) |
| <b>Obesity</b><br>[% (95% C.I.)]                                                                                                                                                                                      | 9.9<br>(8.8, 11.2)   | 19.3<br>(16.5, 22.3) | 13.8<br>(11.8, 16.2) | 27.9<br>(24.7, 31.3) | 1.2<br>(0.8, 1.8)    | 4.0<br>(2.2, 7.1)    | 5.0<br>(4.0, 6.3)    | 12.1<br>(9.7, 15.1)  |
| <b>Abdominal obesity</b><br>[% (95% C.I.)]                                                                                                                                                                            | 62.0<br>(60.0, 64.0) | 72.3<br>(68.9, 75.4) | 67.4<br>(64.6, 70.0) | 83.2<br>(80.6, 85.6) | 50.9<br>(48.7, 53.0) | 72.8<br>(67.0, 77.9) | 67.7<br>(65.1, 70.1) | 82.4<br>(79.0, 85.4) |
| <b>Diabetes Mellitus</b><br>[% (95% C.I.)]                                                                                                                                                                            | 10.3<br>(9.1, 11.7)  | 21.1<br>(18.2, 24.2) | 12.5<br>(10.5, 14.8) | 30.2<br>(26.9, 33.7) | 2.5<br>(1.7, 3.5)    | 6.9<br>(3.6, 12.8)   | 6.6<br>(5.2, 8.5)    | 16.0<br>(12.6, 20.1) |
| <i>Obesity- BMI ≥ 30 Kg/m<sup>2</sup>; Abdominal obesity-Waist-hip-ratio &gt;0.90 for men and &gt;0.85 for women; Diabetes- Fasting Plasma Glucose (FPG) ≥ 126 mg/dl or on medication; SEM-Standard Error of Mean</i> |                      |                      |                      |                      |                      |                      |                      |                      |

STROBE 2007 (v4) Statement—Checklist of items that should be included in reports of *cross-sectional studies*

| Section/Topic             | Item # | Recommendation                                                                                                                                                                       | Reported on page # |
|---------------------------|--------|--------------------------------------------------------------------------------------------------------------------------------------------------------------------------------------|--------------------|
| Title and abstract        | 1      | (a) Indicate the study’s design with a commonly used term in the title or the abstract                                                                                               | 3                  |
|                           |        | (b) Provide in the abstract an informative and balanced summary of what was done and what was found                                                                                  | 3                  |
| <b>Introduction</b>       |        |                                                                                                                                                                                      |                    |
| Background/rationale      | 2      | Explain the scientific background and rationale for the investigation being reported                                                                                                 | 5                  |
| Objectives                | 3      | State specific objectives, including any prespecified hypotheses                                                                                                                     | 5                  |
| <b>Methods</b>            |        |                                                                                                                                                                                      |                    |
| Study design              | 4      | Present key elements of study design early in the paper                                                                                                                              | 5                  |
| Setting                   | 5      | Describe the setting, locations, and relevant dates, including periods of recruitment, exposure, follow-up, and data collection                                                      | 5,6                |
| Participants              | 6      | (a) Give the eligibility criteria, and the sources and methods of selection of participants                                                                                          | 6                  |
| Variables                 | 7      | Clearly define all outcomes, exposures, predictors, potential confounders, and effect modifiers. Give diagnostic criteria, if applicable                                             | 6                  |
| Data sources/ measurement | 8*     | For each variable of interest, give sources of data and details of methods of assessment (measurement). Describe comparability of assessment methods if there is more than one group | 6,7                |
| Bias                      | 9      | Describe any efforts to address potential sources of bias                                                                                                                            |                    |
| Study size                | 10     | Explain how the study size was arrived at                                                                                                                                            | 6                  |
| Quantitative variables    | 11     | Explain how quantitative variables were handled in the analyses. If applicable, describe which groupings were chosen and why                                                         | 7                  |
| Statistical methods       | 12     | (a) Describe all statistical methods, including those used to control for confounding                                                                                                | 7                  |
|                           |        | (b) Describe any methods used to examine subgroups and interactions                                                                                                                  | 7                  |
|                           |        | (c) Explain how missing data were addressed                                                                                                                                          | 5                  |
|                           |        | (d) If applicable, describe analytical methods taking account of sampling strategy                                                                                                   | 7                  |
|                           |        | (e) Describe any sensitivity analyses                                                                                                                                                | 5                  |
| <b>Results</b>            |        |                                                                                                                                                                                      |                    |

1  
2  
3  
4  
5  
6  
7  
8  
9  
10  
11  
12  
13  
14  
15  
16  
17  
18  
19  
20  
21  
22  
23  
24  
25  
26  
27  
28  
29  
30  
31  
32  
33  
34  
35  
36  
37  
38  
39  
40  
41  
42  
43  
44  
45  
46  
47  
48  
49

|                          |     |                                                                                                                                                                                                              |                |
|--------------------------|-----|--------------------------------------------------------------------------------------------------------------------------------------------------------------------------------------------------------------|----------------|
| Participants             | 13* | (a) Report numbers of individuals at each stage of study—eg numbers potentially eligible, examined for eligibility, confirmed eligible, included in the study, completing follow-up, and analysed            | 8              |
|                          |     | (b) Give reasons for non-participation at each stage                                                                                                                                                         | Not applicable |
|                          |     | (c) Consider use of a flow diagram                                                                                                                                                                           | Not applicable |
| Descriptive data         | 14* | (a) Give characteristics of study participants (eg demographic, clinical, social) and information on exposures and potential confounders                                                                     | 8              |
|                          |     | (b) Indicate number of participants with missing data for each variable of interest                                                                                                                          | 10,11          |
| Outcome data             | 15* | Report numbers of outcome events or summary measures                                                                                                                                                         | 10,11          |
| Main results             | 16  | (a) Give unadjusted estimates and, if applicable, confounder-adjusted estimates and their precision (eg, 95% confidence interval). Make clear which confounders were adjusted for and why they were included | 12             |
|                          |     | (b) Report category boundaries when continuous variables were categorized                                                                                                                                    | 7              |
|                          |     | (c) If relevant, consider translating estimates of relative risk into absolute risk for a meaningful time period                                                                                             | Not applicable |
| Other analyses           | 17  | Report other analyses done—eg analyses of subgroups and interactions, and sensitivity analyses                                                                                                               | 7              |
| <b>Discussion</b>        |     |                                                                                                                                                                                                              |                |
| Key results              | 18  | Summarise key results with reference to study objectives                                                                                                                                                     | 14             |
| Limitations              | 19  | Discuss limitations of the study, taking into account sources of potential bias or imprecision. Discuss both direction and magnitude of any potential bias                                                   | 15,16          |
| Interpretation           | 20  | Give a cautious overall interpretation of results considering objectives, limitations, multiplicity of analyses, results from similar studies, and other relevant evidence                                   | 14,15          |
| Generalisability         | 21  | Discuss the generalisability (external validity) of the study results                                                                                                                                        | 15             |
| <b>Other information</b> |     |                                                                                                                                                                                                              |                |
| Funding                  | 22  | Give the source of funding and the role of the funders for the present study and, if applicable, for the original study on which the present article is based                                                | 2              |

\*Give information separately for cases and controls in case-control studies and, if applicable, for exposed and unexposed groups in cohort and cross-sectional studies.

**Note:** An Explanation and Elaboration article discusses each checklist item and gives methodological background and published examples of transparent reporting. The STROBE checklist is best used in conjunction with this article (freely available on the Web sites of PLoS Medicine at <http://www.plosmedicine.org/>, Annals of Internal Medicine at <http://www.annals.org/>, and Epidemiology at <http://www.epidem.com/>). Information on the STROBE Initiative is available at [www.strobe-statement.org](http://www.strobe-statement.org).

# BMJ Open

## Changes in Hypertension Prevalence, Awareness, Treatment and Control Rates over Twenty Years in National Capital Region of India- Results from a repeat cross-sectional study.

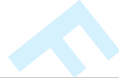

|                                 |                                                                                                                                                                                                                                                                                                                                                                                                                                                                                                                                                                                                                                                                                                                                                                                                                                                                                                                      |
|---------------------------------|----------------------------------------------------------------------------------------------------------------------------------------------------------------------------------------------------------------------------------------------------------------------------------------------------------------------------------------------------------------------------------------------------------------------------------------------------------------------------------------------------------------------------------------------------------------------------------------------------------------------------------------------------------------------------------------------------------------------------------------------------------------------------------------------------------------------------------------------------------------------------------------------------------------------|
| Journal:                        | <i>BMJ Open</i>                                                                                                                                                                                                                                                                                                                                                                                                                                                                                                                                                                                                                                                                                                                                                                                                                                                                                                      |
| Manuscript ID                   | bmjopen-2016-015639.R2                                                                                                                                                                                                                                                                                                                                                                                                                                                                                                                                                                                                                                                                                                                                                                                                                                                                                               |
| Article Type:                   | Research                                                                                                                                                                                                                                                                                                                                                                                                                                                                                                                                                                                                                                                                                                                                                                                                                                                                                                             |
| Date Submitted by the Author:   | 09-May-2017                                                                                                                                                                                                                                                                                                                                                                                                                                                                                                                                                                                                                                                                                                                                                                                                                                                                                                          |
| Complete List of Authors:       | Roy, Ambuj; All India Institute of Medical Sciences, Cardiology<br>Praveen , Pradeep A; All India Institute of Medical Sciences, Endocrinology and Metabolism<br>Amarchand, Ritvik; All India Institute of Medical Sciences, Ramakrishnan, Lakshmy; All India Institute of Medical Sciences, Cardiac Biochemistry<br>Gupta, Ruby; Public Health Foundation of India<br>Kondal, Dimple; Public Health Foundation of India<br>Singh, Kalpana; Public Health Foundation of India<br>Sharma , Meenakshi; Indian Council of Medical Research<br>Shukla, DK; Indian Council Of Medical Research, Non-communicable Diseases<br>Tandon, Nikhil; All India Institute of Medical Sciences, Endocrinology and Metabolism<br>Reddy, KS; Public Health Foundation of India<br>Anand, Krishnan; All India Institute of Medical Sciences, Center for Community Medicine<br>Prabhakaran, Dorairaj; Public Health Foundation of India |
| <b>Primary Subject Heading</b>: | Cardiovascular medicine                                                                                                                                                                                                                                                                                                                                                                                                                                                                                                                                                                                                                                                                                                                                                                                                                                                                                              |
| Secondary Subject Heading:      | Epidemiology                                                                                                                                                                                                                                                                                                                                                                                                                                                                                                                                                                                                                                                                                                                                                                                                                                                                                                         |
| Keywords:                       | Hypertension < CARDIOLOGY, Pre hypertension, Secular Trends, Cardiovasclar Disease Risk Factors, India                                                                                                                                                                                                                                                                                                                                                                                                                                                                                                                                                                                                                                                                                                                                                                                                               |
|                                 |                                                                                                                                                                                                                                                                                                                                                                                                                                                                                                                                                                                                                                                                                                                                                                                                                                                                                                                      |

SCHOLARONE™  
Manuscripts

**Title:** Changes in Hypertension Prevalence, Awareness, Treatment and Control Rates over Twenty Years in National Capital Region of India- Results from a repeat cross-sectional study.

**Sub Title:** Change in hypertension burden over 20 years-NCR, India

**List of Authors and Affiliations**

Ambuj Roy, MD, DM\*

Professor of Cardiology, All India Institute of Medical Sciences, New Delhi, India,

Email: [drambujroy@gmail.com](mailto:drambujroy@gmail.com)

Pradeep A Praveen, MPH

Doctoral Student, Department of Endocrinology and Metabolism,

All India Institute of Medical Sciences, New Delhi, India, Email: [praveen.aims@gmail.com](mailto:praveen.aims@gmail.com)

Ritvik Amarchand, MBBS, PhD

Centre for Community Medicine, All India Institute of Medical Sciences, New Delhi, India,

Email: [drritvik@gmail.com](mailto:drritvik@gmail.com)

Lakshmy Ramakrishnan, PhD

Professor, Department of Cardiac Biochemistry, All India Institute of Medical Sciences, New Delhi,

India, Email: [lakshmy\\_ram@yahoo.com](mailto:lakshmy_ram@yahoo.com)

Ruby Gupta, PhD

Scientific Officer (Biochemistry), Public Health Foundation of India, Gurgaon, India,

Email: [ruby.gupta@phfi.org](mailto:ruby.gupta@phfi.org)

Dimple Kondal, PhD

Statistician, Public Health Foundation of India, Gurgaon, India, Email: [dimple@ccdcindia.org](mailto:dimple@ccdcindia.org)

Kalpana Singh, MSc

Statistician, Public Health Foundation of India, Gurgaon, India, Email: [kalpana.singh@phfi.org](mailto:kalpana.singh@phfi.org)

Meenakshi Sharma, PhD

Scientist E, Indian Council of Medical Research, New Delhi, India, Email: [smeenakshi@hotmail.com](mailto:smeenakshi@hotmail.com)

Deepak Kumar Shukla, PhD

Scientist G & Head, Division of Non Communicable Diseases, Indian Council of Medical Research,

New Delhi, India, Email: [shukladk@icmr.org.in](mailto:shukladk@icmr.org.in)

Nikhil Tandon, MD, PhD

Professor & Head, Department of Endocrinology and Metabolism, All India Institute of Medical

Sciences, New Delhi, India, Email: [nikhil\\_tandon@hotmail.com](mailto:nikhil_tandon@hotmail.com)

Kolli Srinath Reddy, MD, DM, MSc

President, Public Health Foundation of India, Gurgaon, India, Email: [ksrinath.reddy@phfi.org](mailto:ksrinath.reddy@phfi.org)

Anand Krishnan, MD, PhD

Professor, Centre for Community Medicine, All India Institute of Medical Sciences, New Delhi, India,

Email: [kanandiyer@yahoo.com](mailto:kanandiyer@yahoo.com)

1  
2  
3 Dorairaj Prabhakaran, MD, DM, MSc  
4 Professor & Vice President, Public Health Foundation of India, Gurgaon, India,  
5 Email: [dprabhakaran@ccdcindia.org](mailto:dprabhakaran@ccdcindia.org)  
6

7 \*Corresponding Author  
8

9 **Address for correspondence:**

10  
11 Ambuj Roy, MD, DM  
12 Professor of Cardiology,  
13 All India Institute of Medical Sciences  
14 New Delhi, India- 110029.  
15 Email: [drambujroy@gmail.com](mailto:drambujroy@gmail.com)  
16 Phone: 91-9869393945;  
17 Fax: 91-11-26588663  
18  
19

20 Word count: 3007  
21

22 **Competing Interests:** Nothing to declare  
23

24  
25 **Funding:** The study was funded by the Indian Council of Medical Research, New Delhi, India  
26  
27

28 **Contributorship Statement:**

29  
30  
31 Authors Kolli Srinath Reddy, Nikhil Tandon, Dorairaj Prabhakaran, Anand Krishnan, Deepak Kumar  
32 Shukla, Meenakshi Sharma and Ambuj Roy conceptualized and designed the study and revised the  
33 manuscript. Kolli Srinath Reddy, Dorairaj Prabhakaran, Anand Krishnan, Pradeep A Praveen, Ritvik  
34 Amarchand and Ambuj Roy were involved in execution of the study in the field. Pradeep A Praveen,  
35 Dorairaj Prabhakaran and Ambuj Roy drafted and revised the manuscript. Dimple Kondal and  
36 Kalpana Singh did the data analysis. Lakshmy Ramakrishnan and Ruby Gupta coordinated the  
37 biochemical analysis and interpreted the data  
38  
39  
40  
41  
42  
43  
44  
45

46  
47 **Data Sharing Statement:**

48  
49  
50 I, the corresponding author of the manuscript, on behalf of all the other authors here by agree to  
51 share the study data and additional explanatory materials to fellow researchers.  
52  
53  
54

55 **Key Words:** Hypertension; Pre-Hypertension; Secular trends; Cardiovascular disease risk factors;  
56 India  
57

**Abstract**

**Background & Objectives:** Despite being one of the leading risk factors of cardiovascular mortality, there is limited data on changes in hypertension burden and management from India. This study evaluates trend in the prevalence, awareness, treatment and control of hypertension in the urban and rural areas of India's National Capital Region (NCR).

**Design & setting:** Two representative cross-sectional surveys were conducted in urban and rural areas [Survey1 (1991-1994); Survey 2 (2010-2012)] of NCR using similar methodologies.

**Participants:** A total of 3,048 (mean age: 46.8± 9.0; 52.3 % women) and 2,052 (mean age: 46.5±8.4; 54.2 % women) subjects of urban areas and 2,487 (mean age: 46.6±8.8; 57.0% women) and 1,917 (mean age: 46.5±8.5; 51.3 % women) subjects of rural areas were included in Survey 1 & 2 respectively.

**Primary and secondary outcome measures:** Hypertension was defined as per Joint National Committee VII guidelines. Structure questionnaire was used to measure the awareness and treatment status of hypertension. A mean SBP < 140 mm Hg and DBP < 90 mm Hg was defined as control of hypertension among the participants with hypertension.

**Results:** The age and sex standardised prevalence of hypertension increased from 23.0% to 42.2% (p<0.001) and 11.2% to 28.9% (p<0.001) in urban and rural NCR respectively. In both surveys, those with high education, alcohol use, obesity and high fasting blood glucose were at a higher risk for hypertension. However, the change in hypertension prevalence between the surveys was independent of these risk factors [adjusted odds ratio (95% C.I): urban [2.3 (2.0, 2.7)]; rural [3.1 (2.4, 4.0)]. Overall there was no improvement in awareness, treatment and control rates of hypertension in the population.



1  
2  
3 **Conclusion:** There was marked increase in prevalence of hypertension over two decades with no  
4  
5 improvement in management.  
6  
7

#### 8 **Strengths of the study**

- 9  
10  
11 • One of the first studies to report the trends in the population burden and management of  
12 hypertension from the low and middle income countries
- 13  
14  
15 • The study surveyed representative samples from the same population using similar  
16  
17 methodologies and was adequately powered to compare hypertension burden at two time  
18  
19 periods  
20  
21  
22

#### 23 **Limitations of the study**

- 24  
25  
26 • The Instrument used for blood pressure measurement was different in the two studies. This  
27  
28 was inevitable since the apparatus used in first survey was unavailable at the time of the  
29  
30 next survey.  
31  
32
- 33  
34 • Behavioural risk factors like diet and physical activity were not assessed during the first  
35  
36 survey and therefore not reported and they could account for difference in blood pressure  
37  
38 levels as discussed.  
39  
40
- 41  
42 • The study being restricted to urban and rural NCR of Delhi, may not be generalizable across  
43  
44 India.  
45  
46  
47  
48  
49  
50  
51  
52  
53  
54  
55  
56  
57  
58  
59  
60

## Introduction

High blood pressure (HBP) is the single largest risk factor for disease burden worldwide. In India, HBP has now emerged as a leading risk factor for mortality [1]. Several studies over the years have shown increasing prevalence of hypertension in India [2–4]. Kearney et al in their paper predicted that the burden of hypertension in India is expected to almost double from 118 million in 2000 to 213.5 million by 2025[5] . A recent systematic analysis suggested high prevalence with poor awareness, treatment and control of hypertension in India [6].

At the population level the effect of rise in blood pressure is continuous with increasing cardiovascular risk with rise of blood pressure above 115/75 mmHg[7]. According to the Global Burden of Disease-2015 analysis, the estimated rate of annual deaths associated with SBP of at least 110 to 115 mm Hg between 1990 and 2015 has increased from 135.6 to 145.2 per 100 000 persons[8]. However, data from India on trends of population blood pressure distribution, hypertension prevalence, awareness, treatment and control in representative population over time is scarce due to absence of active surveillance. This data is important to formulate informed policy as high blood pressure is one of the key targets to reduce premature mortality due to cardiovascular diseases (CVD) set by World Health Organisation (WHO) and the Indian government[9,10].

We conducted two surveys on prevalence of cardiovascular risk factors between April 1991 and June 1994 (Survey 1) and August 2010 and January 2012 (Survey 2) in National Capital Region (NCR) of India (urban Delhi and adjoining rural Haryana). These surveys enabled us to estimate the changes in blood pressure prevalence and management in this population over this time period.

## Methods

Study population and sample size:

1  
2  
3 The two cross-sectional surveys were carried out in adults aged 35-64 years using a multistage  
4 cluster random sampling method in the urban area and a simple random sampling method in the  
5 rural area to assess the prevalence of coronary artery disease (CAD) and its risk factors. The sample  
6 size was calculated based on estimated prevalence of CAD in the population. The details of sample  
7 size calculation were published elsewhere [11]. Based on this 5535 participants were recruited for  
8 survey 1(urban-3048; rural-2487) and 3969 were recruited for survey 2 (urban-2052; rural-1917). In  
9 both surveys, all eligible individuals from the primary sampling unit (household) were approached  
10 for their consent to participate in the survey.  
11  
12  
13  
14  
15  
16  
17  
18  
19

#### 20 Data collection:

21  
22 Both the surveys got ethical clearance from institutional ethics committees of the participating  
23 institutions. The data were collected through household visits using a standardized questionnaire.  
24 Blood sampling was done through physician led medical camps using standardized equipments and  
25 methods. In survey 1, blood pressure was measured using a random zero sphygmomanometer while  
26 in survey 2 an automated blood pressure machine [OMRON (HEM-7080)] was used. In both surveys,  
27 two blood pressure readings were recorded in sitting position, five minutes apart. If the difference  
28 between the two readings was more than 10mmHg, a third measurement was taken. The mean of  
29 the last two measurements were taken for final analysis. Operational definitions:  
30  
31  
32  
33  
34  
35  
36  
37  
38  
39  
40  
41

42 Pre hypertension and hypertension were defined using the Joint National Committee VII  
43 criteria[12](systolic blood pressure (SBP) 120-139 mm Hg and/or diastolic blood pressure (DBP) 80-  
44 89 mm Hg for pre hypertension and SBP $\geq$  140 mm Hg and/or DBP  $\geq$  90 mm Hg or on blood pressure  
45 lowering medication for hypertension). Those who were diagnosed with hypertension were further  
46 classified in to stage I (SBP140-159 mm Hg and/or DBP 90-99 mm Hg) and stage II (SBP $\geq$  160 mm Hg  
47 and/or DBP  $\geq$  100mm Hg).  
48  
49  
50  
51  
52  
53  
54  
55  
56  
57  
58  
59  
60

1  
2  
3 Hypertension awareness, treatment, and control were analysed in hypertensive participants based  
4 on questionnaires and blood pressure measurements. Among the hypertensive participants, self-  
5 report of any previous clinical diagnosis of hypertension was defined as awareness of hypertension.  
6  
7 Self- reported anti-hypertension medication use was defined as on treatment and a mean SBP < 140  
8 mm Hg and DBP < 90 mm Hg was defined as control of hypertension among the participants with  
9 hypertension.  
10  
11  
12  
13  
14  
15

### 16 17 **Statistical analysis**

18  
19 STATA 12.1 (STATA Corporation, College Station, TX, USA) was used for the statistical analysis.  
20  
21 Prevalence of hypertension along with their standard errors and ratios between Survey 1 and Survey  
22 2 and the awareness, treatment and control levels during Survey 1 and 2 are presented. The age and  
23 gender adjusted prevalence of hypertension was calculated using Indian census data for 2011 as  
24 standard population. Hypertension prevalence was analysed by selected demographic and health  
25 characteristics: gender, place of residence (urban/rural), age category (35-44, 45-54, 55-64),  
26 educational status, Body Mass Index (BMI), blood glucose level and alcohol use. Educational status  
27 was defined as follows: Low (illiterate to primary level), Medium (middle to high school) High (higher  
28 secondary and above). World Health Organisation cut offs were used to categorise BMI values  
29 (normal- BMI<25 kg/m<sup>2</sup>, overweight- BMI 25-<30 kg/m<sup>2</sup>, obesity-BMI≥30 kg/m<sup>2</sup>) and abdominal  
30 obesity [Waist to Hip Ratio (WHR) >0.90 for men and >0.85 for women]. Blood glucose levels were  
31 categorised as normoglycemic (fasting plasma glucose (FPG) < 100 mg/dl), impaired fasting glucose  
32 (FPG 100- <126mg/dl); and diabetes (FPG≥ 126 mg/dl). Alcohol use was defined as any use in the last  
33 twelve months of any alcohol product. The difference in proportions between the surveys was  
34 evaluated using chi square test. Any p value <0.05 was considered statistically significant. Logistic  
35 regression models were constructed for urban and rural populations separately defining prevalence  
36 of hypertension as outcome variable and time period (Survey2 vs Survey 1) as exposure variables.  
37 We added covariates as categorical variables (age groups, gender, obesity, waist-hip-ratio, diabetes  
38  
39  
40  
41  
42  
43  
44  
45  
46  
47  
48  
49  
50  
51  
52  
53  
54  
55  
56  
57  
58  
59  
60

1  
2  
3 and alcohol use), stepwise to the logistic regression model. Adjusted odds ratios and 95% CIs were  
4  
5 reported. We also assessed the interaction between time (Survey 1; Survey 2) and other covariates  
6  
7 mentioned above using likelihood test. If the interaction was found to be significant, then stratified  
8  
9 analysis was reported. We additionally conducted a sensitivity analysis to account for suboptimal  
10  
11 response for biochemical data in survey 1 (<65%) by applying inverse probability weighting  
12  
13 (IPW)[13]. Those who did not participate for blood collection were more likely to be females, lesser  
14  
15 educated, smokers and with low BMI. The IPW approach weighted the analysis by the inverse of the  
16  
17 predicted probability of being observed at a given time point. This was computed based on a logistic  
18  
19 model with gender, education, smoking status and BMI as predictors for non-response bias for  
20  
21 Survey 1 and gender, education, smoking status, BMI, time of survey and site as predictors for both  
22  
23 survey together.  
24  
25

## 26 27 **Results**

28  
29  
30 A total of 3,048 (mean (SD) age: 46.8 (9.0) years; 52.3 % females) and 2,052 (mean (SD) age: 46.5  
31  
32 (8.4) years; 54.2 % females) subjects of urban areas and 2,487 (mean (SD) age: 46.6 (8.8) years; 57.0  
33  
34 % females) and 1,917 (mean (SD) age: 46.5 (8.5) years; 51.3 % females) subjects of rural areas were  
35  
36 recruited in Survey 1 & 2 respectively. Ninety-nine% of the participants in both surveys had their  
37  
38 blood pressure measured. Among those surveyed, 95% and 78% in Survey 1 and Survey 2  
39  
40 respectively of the urban sample and 51% and 65% in Survey 1 and Survey 2 respectively of the rural  
41  
42 sample agreed to provide a fasting blood sample for biochemical analysis.  
43  
44

45  
46 The prevalence of hypertension increased from 23.0% to 42.2% and 11.2% to 28.9% in urban and  
47  
48 rural NCR of Delhi respectively between the two surveys. The increase in prevalence was by 83% in  
49  
50 urban NCR and 158% in rural NCR. The rise in prevalence was more in men with a rise of 94% and  
51  
52 73% in urban areas and 191% and 125% in rural areas in men and women respectively (Table 1). The  
53  
54 age specific prevalence of hypertension revealed an increase in prevalence at all ages except in the  
55  
56

1  
2  
3 highest age group (55-64 years) of urban men and women. The rise in age specific prevalence was  
4  
5 highest in the youngest age group (35-44) with a rise in prevalence of 153%, 115%, 239% and 336%,  
6  
7 in urban men, urban women, rural men and rural women respectively.  
8  
9

10 The distribution of blood pressure in the population (excluding those on anti-hypertensive therapy),  
11  
12 changed significantly over the years. In survey 2, there was lesser proportion of the people with  
13  
14 optimum blood pressure values (BP <120/80mmhg) and a higher proportion of individuals with pre-  
15  
16 hypertension, Stage I and Stage II hypertension (Figure 1) compared to survey 1. This change of  
17  
18 distribution was similar across men and women in NCR and also both in urban and rural areas.  
19  
20

21 The prevalence of hypertension was stratified by other known risk factors associated with blood  
22  
23 pressure (Figure 2). Hypertension prevalence increased with increasing BMI and education  
24  
25 categories in both urban and rural population (Figure 2). The prevalence was highest among those  
26  
27 with diabetes followed by those with impaired fasting blood glucose in both urban and rural areas  
28  
29 (Figure 2). Alcohol users had higher prevalence of hypertension (Figure 2). The prevalence increased  
30  
31 in each of these categories in survey 2 as compared to Survey 1.  
32  
33

34 The distribution of risk factors in those with and without hypertension in urban and rural areas is as  
35  
36 in supplementary table-1. The prevalence of alcohol use, obesity, abdominal obesity and diabetes  
37  
38 increased significantly among those with hypertension in survey 2 compared to survey 1. The  
39  
40 relative increase in hypertension prevalence between the surveys was modelled as if there was no  
41  
42 change in these risk factors and the demographic profile between the surveys. The increased odds  
43  
44 ratio of hypertension in Survey 2 as compared to Survey 1 persisted even after adjusting for these  
45  
46 factors. On analysis, a significant interaction between time and age was observed. The age stratified  
47  
48 models suggested higher odds of change in hypertension prevalence among the youngest age group  
49  
50 in both urban and rural areas (Table-2). The sensitivity analysis using IPW did not show any  
51  
52  
53  
54  
55  
56  
57  
58  
59  
60

1  
2  
3 significant difference in the estimates after accounting for the suboptimal response for blood  
4  
5 sampling in survey 1 (data not shown).  
6  
7

8 There was no change in the overall awareness, treatment and control rates of hypertension between  
9  
10 the two surveys in the NCR (Table 3). When stratified by gender the awareness, treatment and  
11  
12 control rates of hypertension in men decreased in the second survey while awareness and treatment  
13  
14 but not control rates improved in women. The overall rates of all three parameters were higher in  
15  
16 woman than men. Similarly in urban areas there was no change in the overall awareness, treatment  
17  
18 and control rates of hypertension between the two surveys though all three parameters decreased  
19  
20 in men with no significant change in women with higher overall rates in women. In rural NCR the  
21  
22 overall awareness, treatment and control rates of hypertension improved between the two surveys.  
23  
24 This was seen in men and women except for control rates in men which did not improve. However,  
25  
26 though all three rates improved in rural areas, the overall awareness (46.4% vs26.8%), treatment  
27  
28 (40.0vs 20.4%) and control rates (15.9vs 8.0%) in rural areas remained much lower than in urban  
29  
30 areas.  
31  
32  
33  
34  
35  
36  
37  
38  
39  
40  
41  
42  
43  
44  
45  
46  
47  
48  
49  
50  
51  
52  
53  
54  
55  
56  
57  
58  
59  
60

Table 1: Age & sex standardized and age-specific prevalence of hypertension: Survey 1 and Survey 2

|              | Rural          |      |      |                |      |      |                    |                 | Urban          |      |      |                |      |      |                    |                 |
|--------------|----------------|------|------|----------------|------|------|--------------------|-----------------|----------------|------|------|----------------|------|------|--------------------|-----------------|
|              | Survey 1       |      |      | Survey 2       |      |      | P Value-Difference | Ratio (95% C.I) | Survey 1       |      |      | Survey 2       |      |      | P Value-Difference | Ratio           |
| N            | Prevalence (%) | SE   | N    | Prevalence (%) | SE   | N    |                    |                 | Prevalence (%) | SE   | N    | Prevalence (%) | SE   |      |                    |                 |
| Total        | 2,469          | 11.2 | 0.01 | 1914           | 28.9 | 1    | <0.001             | 2.6 (2.3, 2.9)  | 3,041          | 23   | 0.01 | 2026           | 42.2 | 1.1  | <0.001             | 1.8 (1.6, 1.9)  |
| Men          | 1,065          | 12.2 | 0.01 | 981            | 32.6 | 1.5  | <0.001             | 2.7 (2.2, 3.3)  | 1,451          | 22.3 | 0.01 | 924            | 43.3 | 1.6  | <0.001             | 1.9 (1.8, 2.3)  |
| Women        | 1,404          | 10.2 | 0.01 | 933            | 25.2 | 1.4  | <0.001             | 2.5 (2.4, 3.6)  | 1,590          | 23.8 | 0.01 | 1102           | 41.1 | 1.4  | <0.001             | 1.7 (1.5, 2.0)  |
| <b>Men</b>   |                |      |      |                |      |      |                    |                 |                |      |      |                |      |      |                    |                 |
| 35-44        | 441            | 8.1  | 0.01 | 459            | 27.4 | 0.02 | <0.001             | 3.4 (2.4, 4.8)  | 646            | 13.4 | 0.01 | 434            | 33.9 | 0.02 | <0.001             | 2.5 (2.0, 3.3)  |
| 45-54        | 318            | 12.2 | 0.02 | 315            | 36.1 | 0.03 | <0.001             | 3.0 (2.1, 4.1)  | 432            | 21.6 | 0.02 | 299            | 47.9 | 0.03 | <0.001             | 2.2 (1.8, 2.8)  |
| 55-64        | 306            | 21.6 | 0.02 | 207            | 38.6 | 0.03 | <0.001             | 1.8 (1.4, 2.4)  | 373            | 34.5 | 0.03 | 191            | 42.5 | 0.02 | NS                 | 1.2 (1.0, 1.6)  |
| <b>Women</b> |                |      |      |                |      |      |                    |                 |                |      |      |                |      |      |                    |                 |
| 35-44        | 667            | 4.3  | 0.01 | 433            | 18.7 | 0.02 | <0.001             | 4.4 (3.1, 6.9)  | 723            | 12.8 | 0.01 | 521            | 27.6 | 0.02 | <0.001             | 2.2 (1.8, 2.8)  |
| 45-54        | 438            | 9.4  | 0.01 | 277            | 28.5 | 0.03 | 0.001              | 3.0 (2.2, 4.4)  | 450            | 25.9 | 0.02 | 321            | 46.9 | 0.03 | <0.001             | 1.8 (1.5, 2.2)  |
| 55-64        | 299            | 23.1 | 0.02 | 223            | 33.3 | 0.03 | 0.011              | 1.4 (1.1, 1.9)  | 417            | 57.6 | 0.04 | 260            | 59.8 | 0.03 | NS                 | 1.0 (0.99, 1.6) |

N- Sample size; SE- Standard Error; Ratio-Survey2/Survey1: NS-not statistically significant



1  
2  
3  
4  
5  
6  
7  
8  
9  
10  
11  
12  
13  
14  
15  
16  
17  
18  
19  
20  
21  
22  
23  
24  
25  
26  
27  
28  
29  
30  
31  
32  
33  
34  
35  
36  
37  
38  
39  
40  
41  
42  
43  
44  
45  
46  
47  
48  
49

|                                                                                                                                                                                                                                                                                                                                                                                                             | Odds ratio (95% CI) |                |
|-------------------------------------------------------------------------------------------------------------------------------------------------------------------------------------------------------------------------------------------------------------------------------------------------------------------------------------------------------------------------------------------------------------|---------------------|----------------|
|                                                                                                                                                                                                                                                                                                                                                                                                             | Rural               | Urban          |
| Unadjusted                                                                                                                                                                                                                                                                                                                                                                                                  | 3.2 (2.7, 3.8)      | 2.3 (2.0, 2.6) |
| Model 1: Adjusted for age                                                                                                                                                                                                                                                                                                                                                                                   | 3.4 (2.9, 4.0)      | 2.6 (2.3, 2.9) |
| Model 2: Adjusted for age and gender                                                                                                                                                                                                                                                                                                                                                                        | 3.3 (2.8, 3.9)      | 2.6 (2.3, 2.9) |
| Model 3: Adjusted for age, gender and obesity                                                                                                                                                                                                                                                                                                                                                               | 3.1 (2.6, 3.6)      | 2.6 (2.2, 2.9) |
| Model 4: Adjusted for age, gender and WHR                                                                                                                                                                                                                                                                                                                                                                   | 3.1 (2.6,3.6)       | 2.4 (2.1,2.8)  |
| Model 5: Adjusted for age, gender, obesity and WHR                                                                                                                                                                                                                                                                                                                                                          | 2.9 (2.4,3.4)       | 2.4 (2.1,2.8)  |
| Model 6: Adjusted for age, gender, obesity, WHR and diabetes                                                                                                                                                                                                                                                                                                                                                | 3.3(2.6,4.1)        | 2.4 (2.1,2.7)  |
| Model 7: Adjusted for age, gender, obesity, WHR, diabetes and alcohol use                                                                                                                                                                                                                                                                                                                                   | 3.1 (2.4, 4.0)      | 2.3 (2.0,2.7)  |
| Model 8: Model 7 stratified by age groups                                                                                                                                                                                                                                                                                                                                                                   |                     |                |
| Age 35-44 years                                                                                                                                                                                                                                                                                                                                                                                             | 5.0(3.0,8.4)        | 2.7(2.1,3.4)   |
| Age 45-54 years                                                                                                                                                                                                                                                                                                                                                                                             | 1.6(1.2,2.1)        | 2.1(1.6,2.6)   |
| Age 55-64 years                                                                                                                                                                                                                                                                                                                                                                                             | 2.1(1.6,2.9)        | 2.6(1.9,3.4)   |
| <i>Obesity- BMI <math>\geq</math> 30 Kg/m<sup>2</sup>; Diabetes- Fasting Plasma Glucose (FPG) <math>\geq</math> 126 mg/dl or on medication; Abdominal obesity-Waist-hip-ratio <math>&gt;</math>0.90 for men and <math>&gt;</math>0.85 for women; p-value for interaction between time and age (rural) <math>p=0.0001</math>; p-value for interaction between time and age (urban) <math>p=0.0008</math></i> |                     |                |

1  
2  
3  
4  
5  
6  
7  
8  
9  
10  
11  
12  
13  
14  
15  
16  
17  
18  
19  
20  
21  
22  
23  
24  
25  
26  
27  
28  
29  
30  
31  
32  
33  
34  
35  
36  
37  
38  
39  
40  
41  
42  
43  
44  
45  
46  
47  
48  
49

**Table-3: Hypertension awareness, treatment and control among hypertensive population in NCR of Delhi: Survey 1 and Survey 2**

|              | Awareness    |              |         | Treatment    |              |         | Control      |              |         |
|--------------|--------------|--------------|---------|--------------|--------------|---------|--------------|--------------|---------|
|              | Survey 1 (%) | Survey 2 (%) | P value | Survey 1 (%) | Survey 2 (%) | P value | Survey 1 (%) | Survey 2 (%) | P value |
| <b>Total</b> | 37.5         | 38.7         | NS      | 32.0         | 32.3         | NS      | 14.4         | 12.8         | NS      |
| Men          | 33.1         | 26.8         | 0.02    | 28.3         | 21.1         | 0.01    | 13.1         | 7.1          | 0.01    |
| Women        | 41.5         | 51.1         | 0.001   | 35.4         | 43.9         | 0.001   | 15.6         | 18.7         | NS      |
| <b>Urban</b> |              |              |         |              |              |         |              |              |         |
| Total        | 49.0         | 46.4         | NS      | 41.6         | 40.0         | NS      | 19.0         | 15.9         | NS      |
| Men          | 44.3         | 34.7         | 0.01    | 37.8         | 29.2         | 0.01    | 17.6         | 10.7         | 0.01    |
| Women        | 53.2         | 56.9         | NS      | 45.0         | 49.6         | NS      | 20.2         | 20.4         | NS      |
| <b>Rural</b> |              |              |         |              |              |         |              |              |         |
| Total        | 7.2          | 26.8         | 0.001   | 6.8          | 20.4         | 0.01    | 2.5          | 8.0          | 0.001   |
| Men          | 5.7          | 17.0         | 0.001   | 5.0          | 11.0         | 0.04    | 2.1          | 2.5          | NS      |
| Women        | 8.7          | 40           | <0.001  | 8.7          | 33.2         | <0.001  | 2.9          | 15.3         | <0.001  |

NS- not statistically significant

## Discussion

The repeat survey in NCR of Delhi done after two decades shows (1) continued gradient in urban rural prevalence of hypertension (2) Significant increases in prevalence of hypertension both in urban and rural areas with a higher increase in rural areas,(3) highest increase in prevalence of hypertension in the youngest age group (35-44 years) surveyed, (4) a rightward shift in the distribution of blood pressure in both urban and rural populations with fewer individuals with optimum blood pressure (<120/80), (5)strong relationship between hypertension and BMI, education level, fasting glucose levels and alcohol use, however, even after adjusting for all these predictor variables the odds of hypertension prevalence remained higher in the second survey (6) no change in overall awareness , treatment and control rates of hypertension in NCR

Prevalence of hypertension has been consistently increasing over the years; however, most reviews from India have included old studies. Recent repeat surveys done in other cities have shown varying results. A study from Jaipur revealed no significant change in hypertension prevalence over 2 decades from 1990 with a decrease in mean systolic blood pressure during this period[14]. A repeat survey from Chennai showed rise in self-reported prevalence in hypertension in low and middle income groups[15]. However, these studies included only urban subjects and utilised convenience sampling and thus were not representative of the population. Our study done on a representative urban and rural sample revealed that the prevalence of hypertension increased in urban and rural areas with a higher rate of rise in the rural population. A recent systematic review of hypertension found a prevalence of 27.6% in rural India though it was only 16.7% in rural Northern India[6]which was at variance with our findings. However, more recent studies from North India have suggested prevalence of 22% and 32%in similar age groups, which is close to the prevalence in our study of 28.9% and those from other parts of rural India[16][17].

1  
2  
3 The age stratified prevalence showed increase in all age groups except the oldest in urban areas,  
4  
5 with the highest rate of rise of hypertension in the youngest age group (35-44 years). Indirect  
6  
7 evidence of high burden of risk factors in young comes from occurrence of cardiovascular diseases at  
8  
9 younger age in South Asians as compared the Caucasians [4]. A study among the young individuals  
10  
11 (20-30 years) from South India revealed a very high burden of 45.2% of pre-hypertension in the  
12  
13 population[18]. However, the rapid rise of the burden of hypertension in young in last two decades  
14  
15 has probably been demonstrated for the first time in this study and is worrisome and calls for urgent  
16  
17 action to prevent further burden of pre-mature CVD in Indians.  
18  
19

20  
21 The other important finding was the worsening of population blood pressure levels over two  
22  
23 decades with a significantly lower proportion of the population having optimum blood pressure and  
24  
25 more of them having pre-hypertension and hypertension. Small shifts in population blood pressure  
26  
27 levels is known to lead to large increases in the burden of CVD in the community[7] and thus this  
28  
29 also portends future worsening of CVD epidemic in India. It calls for population level intervention  
30  
31 like advocacy for salt reduction, weight reduction and increase physical activity. The prevalence of  
32  
33 hypertension was expectantly dependant on BMI and fasting glucose levels with higher rates among  
34  
35 overweight and obese and those with impaired fasting glucose and diabetes. This finding is  
36  
37 consistent across most studies in India and abroad[19–21]. The association of hypertension in India  
38  
39 with education is variable. A recent large cohort study from South Asia reported higher prevalence  
40  
41 among more educated[22]. Some have reported reverse gradient with education[23]while others  
42  
43 have reported no relationship[24][25]Alcohol use was associated with higher prevalence of  
44  
45 hypertension as seen in other studies[26]. Limited data from South Asia suggests higher blood  
46  
47 pressure levels in alcohol users[27] and also higher probability of MI in them than alcohol  
48  
49 abstainers[28]unlike other population groups. Interestingly, the rise in prevalence of hypertension in  
50  
51 Survey 2 was significant even after adjusting for these factors. This could be due to other  
52  
53  
54  
55  
56  
57  
58  
59  
60

1  
2  
3 unmeasured lifestyle factors known to be associated with high blood pressure like diet, physical  
4  
5 activity, stress etc, data for which was not available for both studies.  
6  
7

8 The prevalence, awareness and control rates for hypertension were overall sub-optimal with no  
9  
10 improvement between the 2 surveys. The rates of awareness, treatment and control of hypertension  
11  
12 were comparable to the pooled estimates reported in systematic reviews with better rates in urban  
13  
14 areas as compared to rural areas [2,6]. Additionally these rates were better in women as compared  
15  
16 to men, as has been reported consistently in large studies from India and abroad[29,30]. This is  
17  
18 related to greater health seeking behaviour in women [30]. This study additionally provided insights  
19  
20 into the change in these rates over the last two decades which is not available from India earlier. The  
21  
22 disturbing fact was that despite rising prevalence of hypertension there was no improvement in  
23  
24 these rates with all three rates worsening in men with improvement in awareness, treatment but  
25  
26 not control rates in women. When analysed by site and gender all rates except control rates in men  
27  
28 improved in rural areas while in urban areas they worsened in men and remained unchanged in  
29  
30 women. However, the overall rates in rural areas were still much lower than urban areas and the  
31  
32 improvement in rural areas could be attributed to low rates in the first survey.  
33  
34  
35  
36

### 37 **Strengths and limitations**

38  
39 The strengths of this study is that it surveyed population representative sample in the same  
40  
41 population using similar methodologies and was adequately powered, thus providing opportunity to  
42  
43 compare hypertension statistics at two time periods. Such temporal trend was not available from  
44  
45 urban and rural areas of India earlier. One of the limitations of this study is that the apparatus used  
46  
47 for blood pressure measurement was different in the two studies. This was inevitable since the  
48  
49 apparatus used in first survey was unavailable at the time of the next survey. The two apparatus  
50  
51 have marginal difference and if anything the current method of automated blood pressure monitors  
52  
53 is known to underestimate blood pressure[31]and thus the prevalence and shift in blood pressure  
54  
55  
56  
57  
58  
59  
60

1  
2  
3 levels in the population would only be higher. The other limitation is that behavioural risk factors like  
4  
5 diet and physical activity were not assessed during the first survey and therefore not reported and  
6  
7 they could account for difference in blood pressure levels as discussed. In addition macro level  
8  
9 changes in the population like socio-economic transition, urbanisation, policy etc. are not accounted  
10  
11 for in our study. The study being restricted to urban and rural NCR of Delhi, may not be generalizable  
12  
13 across India though similar prevalence rates have been reported across the country.  
14  
15

### 16 17 **Conclusions**

18  
19 This two time survey of NCR of Delhi shows marked increase in prevalence of hypertension in the  
20  
21 last two decades both in rural and urban areas with higher rates of increase in younger age. This was  
22  
23 also associated with fewer individuals with optimum blood pressure and more with pre-  
24  
25 hypertension and hypertension. This calls for urgent population and high risk approach to lower  
26  
27 blood pressure in the community as the overall awareness, treatment and control levels showed no  
28  
29 improvement over this time frame.  
30  
31

### 32 33 **Figure Legend**

34  
35  
36 Figure-1: Distribution of BP categories (%) in untreated population of NCR of Delhi: A) Urban Men;  
37  
38 (B) Urban Women; (C) Rural Men; (D) Rural Women  
39  
40

41  
42 Figure-2: Prevalence (%) of hypertension stratified by risk factors: (A) Education status; (B) Body  
43  
44 Mass Index(BMI); (C) Fasting Plasma Glucose; (D) Alcohol Use  
45  
46  
47  
48  
49  
50  
51  
52  
53  
54  
55  
56  
57  
58  
59  
60

## References

- 1 Lim SS, Vos T, Flaxman AD, *et al.* A comparative risk assessment of burden of disease and injury attributable to 67 risk factors and risk factor clusters in 21 regions, 1990-2010: a systematic analysis for the Global Burden of Disease Study 2010. *Lancet* 2012;**380**:2224–60. doi:10.1016/S0140-6736(12)61766-8
- 2 Devi P, Rao M, Sigamani A, *et al.* Prevalence, risk factors and awareness of hypertension in India: a systematic review. *J Hum Hypertens* 2013;**27**:281–7. doi:10.1038/jhh.2012.33
- 3 Gupta R. Trends in hypertension epidemiology in India. *J Hum Hypertens* 2004;**18**:73–8. doi:10.1038/sj.jhh.1001633
- 4 Prabhakaran D, Jeemon P, Roy A. Cardiovascular Diseases in India. *Circulation* 2016;**133**:1605–20. doi:10.1161/CIRCULATIONAHA.114.008729
- 5 Kearney PM, Whelton M, Reynolds K, *et al.* Global burden of hypertension: analysis of worldwide data. *Lancet*; **365**:217–23. doi:10.1016/S0140-6736(05)17741-1
- 6 Anchala R, Kannuri NK, Pant H, *et al.* Hypertension in India: a systematic review and meta-analysis of prevalence, awareness, and control of hypertension. *J Hypertens* 2014;**32**:1170–7. doi:10.1097/HJH.0000000000000146
- 7 Lewington S, Clarke R, Qizilbash N, *et al.* Age-specific relevance of usual blood pressure to vascular mortality: a meta-analysis of individual data for one million adults in 61 prospective studies. *Lancet* 2002;**360**:1903–13. <http://www.ncbi.nlm.nih.gov/pubmed/12493255> (accessed 2 Feb2015).
- 8 Forouzanfar MH, Liu P, Roth GA, *et al.* Global Burden of Hypertension and Systolic Blood Pressure of at Least 110 to 115 mm Hg, 1990-2015. *JAMA* 2017;**317**:165.

- 1  
2  
3 doi:10.1001/jama.2016.19043  
4  
5  
6 9 United Nations. UN General Assembly resolution on the prevention and control of non  
7  
8 communicable diseases. 2010.www.un.org (accessed 5 Mar2014).  
9  
10  
11 10 World Health Organization. NCD Global Monitoring Framework.  
12  
13 2013.http://www.who.int/nmh/global\_monitoring\_framework (accessed 5 Mar2014).  
14  
15  
16 11 Prabhakaran D, Roy A, Praveen PA, *et al*. 20-Year Trend of Cardiovascular Disease Risk  
17  
18 Factors: Urban and Rural National Capital Region of Delhi, India. *Glob Heart* Published Online  
19  
20 First: 11 April 2017. doi:10.1016/j.gheart.2016.11.004  
21  
22  
23 12 Chobanian A V, Bakris GL, Black HR, *et al*. The Seventh Report of the Joint National  
24  
25 Committee on Prevention, Detection, Evaluation, and Treatment of High Blood Pressure: the  
26  
27 JNC 7 report. *JAMA* 2003;**289**:2560–72. doi:10.1001/jama.289.19.2560  
28  
29  
30  
31 13 Seaman SR, White IR. Review of inverse probability weighting for dealing with missing data.  
32  
33 *Stat Methods Med Res* 2013;**22**:278–95. doi:10.1177/0962280210395740  
34  
35  
36 14 Gupta R, Guptha S, Gupta VP, *et al*. Twenty-year trends in cardiovascular risk factors in India  
37  
38 and influence of educational status. *Eur J Prev Cardiol* 2012;**19**:1258–71.  
39  
40 doi:10.1177/1741826711424567  
41  
42  
43 15 Deepa M, Anjana RM, Manjula D, *et al*. Convergence of prevalence rates of diabetes and  
44  
45 cardiometabolic risk factors in middle and low income groups in urban India: 10-year follow-  
46  
47 up of the Chennai Urban Population Study. *J Diabetes Sci Technol* 2011;**5**:918–  
48  
49 27.http://www.pubmedcentral.nih.gov/articlerender.fcgi?artid=3192599&tool=pmcentrez&r  
50  
51 endertype=abstract (accessed 30 May2016).  
52  
53  
54 16 Kishore J, Gupta N, Kohli C, *et al*. Prevalence of Hypertension and Determination of Its Risk  
55  
56  
57  
58  
59  
60



- 1  
2  
3 Factors in Rural Delhi. *Int J Hypertens* 2016;**2016**:7962595. doi:10.1155/2016/7962595  
4  
5  
6 17 Bansal SK, Saxena V, Kandpal SD, *et al.* The prevalence of hypertension and hypertension risk  
7  
8 factors in a rural Indian community: A prospective door-to-door study. *J Cardiovasc Dis Res*  
9  
10 2012;**3**:117–23. doi:10.4103/0975-3583.95365  
11  
12  
13 18 Kini S, Kamath VG, Kulkarni MM, *et al.* Pre-Hypertension among Young Adults (20-30 Years) in  
14  
15 Coastal Villages of Udupi District in Southern India: An Alarming Scenario. *PLoS One*  
16  
17 2016;**11**:e0154538. doi:10.1371/journal.pone.0154538  
18  
19  
20 19 Cutler JA, Sorlie PD, Wolz M, *et al.* Trends in hypertension prevalence, awareness, treatment,  
21  
22 and control rates in United States adults between 1988-1994 and 1999-2004. *Hypertension*  
23  
24 2008;**52**:818–27. doi:10.1161/HYPERTENSIONAHA.108.113357  
25  
26  
27  
28 20 Menéndez E, Delgado E, Fernández-Vega F, *et al.* Prevalence, Diagnosis, Treatment, and  
29  
30 Control of Hypertension in Spain. Results of the Di@bet.es Study. *Rev española Cardiol*  
31  
32 *(English ed)* 2016;**69**:572–8. doi:10.1016/j.rec.2015.11.034  
33  
34  
35 21 Bhadoria AS, Kasar PK, Toppo NA, *et al.* Prevalence of hypertension and associated  
36  
37 cardiovascular risk factors in Central India. *J Family Community Med* 2014;**21**:29–38.  
38  
39 doi:10.4103/2230-8229.128775  
40  
41  
42 22 Ali MK, Bhaskarapillai B, Shivashankar R, *et al.* Socioeconomic status and cardiovascular risk in  
43  
44 urban South Asia: The CARRS Study. *Eur J Prev Cardiol* 2016;**23**:408–19.  
45  
46 doi:10.1177/2047487315580891  
47  
48  
49 23 Reddy KS, Prabhakaran D, Jeemon P, *et al.* Educational status and cardiovascular risk profile  
50  
51 in Indians. *Proc Natl Acad Sci U S A* 2007;**104**:16263–8. doi:10.1073/pnas.0700933104  
52  
53  
54  
55 24 Samuel P, Antonisamy B, Raghupathy P, *et al.* Socio-economic status and cardiovascular risk  
56  
57  
58  
59  
60

- 1  
2  
3 factors in rural and urban areas of Vellore, Tamilnadu, South India. *Int J Epidemiol*  
4  
5 2012;**41**:1315–27. doi:10.1093/ije/dys001  
6  
7  
8 25 Kar SS, Thakur JS, Viridi NK, *et al.* Risk factors for cardiovascular diseases: is the social gradient  
9  
10 reversing in northern India? *Natl Med J India*; **23**:206–  
11  
12 9. <http://www.ncbi.nlm.nih.gov/pubmed/21192513> (accessed 30 May 2016).  
13  
14  
15 26 Huang X, Zhou Z, Liu J, *et al.* Prevalence, awareness, treatment, and control of hypertension  
16  
17 among China's Sichuan Tibetan population: A cross-sectional study. *Clin Exp Hypertens*  
18  
19 2016;**38**:457–63. doi:10.3109/10641963.2016.1163369  
20  
21  
22 27 Roy A, Prabhakaran D, Jeemon P, *et al.* Impact of alcohol on coronary heart disease in Indian  
23  
24 men. *Atherosclerosis* 2010;**210**:531–5. doi:10.1016/j.atherosclerosis.2010.02.033  
25  
26  
27  
28 28 Leong DP, Smyth A, Teo KK, *et al.* Patterns of alcohol consumption and myocardial infarction  
29  
30 risk: observations from 52 countries in the INTERHEART case-control study. *Circulation*  
31  
32 2014;**130**:390–8. doi:10.1161/CIRCULATIONAHA.113.007627  
33  
34  
35 29 Chow CK, Teo KK, Rangarajan S, *et al.* Prevalence, awareness, treatment, and control of  
36  
37 hypertension in rural and urban communities in high-, middle-, and low-income countries.  
38  
39 *JAMA* 2013;**310**:959–68. doi:10.1001/jama.2013.184182  
40  
41  
42 30 Irazola VE, Gutierrez L, Bloomfield G, *et al.* Hypertension Prevalence, Awareness, Treatment,  
43  
44 and Control in Selected LMIC Communities. *Glob Heart* 2016;**11**:47–59.  
45  
46 doi:10.1016/j.gheart.2015.12.008  
47  
48  
49 31 Ostchega Y, Zhang G, Sorlie P, *et al.* Blood pressure randomized methodology study  
50  
51 comparing automatic oscillometric and mercury sphygmomanometer devices: National  
52  
53 Health and Nutrition Examination Survey, 2009–2010. *Natl Health Stat Report* 2012;:1–15.  
54  
55  
56  
57  
58  
59  
60

Figure 1 : Distribution of BP categories (%) in untreated population of NCR of Delhi



HT: Hypertension; Normal: BP<120mmHg and DBP<80 mmHg; Pre hypertension: BP 120-139 mmHg or DBP 80-89 mmHg; Hypertension Stage I: SBP 140-159or DBP 90-99; Hypertension Stage II: SBP≥160 or DBP≥ 100; S1: Survey-1; S2: Survey-2; \* Difference in distribution of blood pressure categories of Survey 1 &2

Figure-1: Distribution of BP categories (%) in untreated population of NCR of Delhi: A) Urban Men; (B) Urban Women; (C) Rural Men; (D) Rural Women

260x193mm (300 x 300 DPI)



Figure-2: Prevalence (%) of hypertension stratified by risk factors: (A) Education status; (B) Body Mass Index(BMI); (C) Fasting Plasma Glucose; (D) Alcohol Use

250x178mm (300 x 300 DPI)

1  
2  
3  
4  
5  
6  
7  
8  
9  
10  
11  
12  
13  
14  
15  
16  
17  
18  
19  
20  
21  
22  
23  
24  
25  
26  
27  
28  
29  
30  
31  
32  
33  
34  
35  
36  
37  
38  
39  
40  
41  
42  
43  
44  
45  
46  
47

|                                                                                                                                                                                                                       | Urban                |                      |                      |                      | Rural                |                      |                      |                      |
|-----------------------------------------------------------------------------------------------------------------------------------------------------------------------------------------------------------------------|----------------------|----------------------|----------------------|----------------------|----------------------|----------------------|----------------------|----------------------|
|                                                                                                                                                                                                                       | Survey 1             |                      | Survey 2             |                      | Survey 1             |                      | Survey 2             |                      |
|                                                                                                                                                                                                                       | Without hypertension | With hypertension    |
| <b>Age</b><br>[Mean ± SEM]                                                                                                                                                                                            | 45.6±0.2             | 52.0±0.3             | 44.7±0.2             | 48.9±0.3             | 46.0±0.2             | 51.9±0.5             | 45.8±0.2             | 48.2±0.4             |
| <b>Gender</b><br>Women[% (95% C.I.)]                                                                                                                                                                                  | 52.0<br>(50.0, 54.0) | 53.2<br>(49.5, 56.8) | 55.5<br>(52.6, 58.3) | 52.9<br>(49.5, 56.2) | 57.8<br>(55.7, 59.8) | 49.6<br>(43.8, 55.5) | 51.3<br>(48.6, 53.9) | 42.5<br>(38.4, 46.7) |
| <b>Alcohol use (Yes)</b><br>[% (95% C.I.)]                                                                                                                                                                            | 14.0<br>(12.6, 15.5) | 14.2<br>(11.8, 17.0) | 20.8<br>(18.5, 23.2) | 26.1<br>(23.2, 29.1) | 5.5<br>(4.5, 6.7)    | 7.6<br>(4.7, 12.0)   | 30.9<br>(28.5, 33.4) | 39.8<br>(35.8, 43.9) |
| <b>Obesity</b><br>[% (95% C.I.)]                                                                                                                                                                                      | 9.9<br>(8.8, 11.2)   | 19.3<br>(16.5, 22.3) | 13.8<br>(11.8, 16.2) | 27.9<br>(24.7, 31.3) | 1.2<br>(0.8, 1.8)    | 4.0<br>(2.2, 7.1)    | 5.0<br>(4.0, 6.3)    | 12.1<br>(9.7, 15.1)  |
| <b>Abdominal obesity</b><br>[% (95% C.I.)]                                                                                                                                                                            | 62.0<br>(60.0, 64.0) | 72.3<br>(68.9, 75.4) | 67.4<br>(64.6, 70.0) | 83.2<br>(80.6, 85.6) | 50.9<br>(48.7, 53.0) | 72.8<br>(67.0, 77.9) | 67.7<br>(65.1, 70.1) | 82.4<br>(79.0, 85.4) |
| <b>Diabetes Mellitus</b><br>[% (95% C.I.)]                                                                                                                                                                            | 10.3<br>(9.1, 11.7)  | 21.1<br>(18.2, 24.2) | 12.5<br>(10.5, 14.8) | 30.2<br>(26.9, 33.7) | 2.5<br>(1.7, 3.5)    | 6.9<br>(3.6, 12.8)   | 6.6<br>(5.2, 8.5)    | 16.0<br>(12.6, 20.1) |
| <i>Obesity- BMI ≥ 30 Kg/m<sup>2</sup>; Abdominal obesity-Waist-hip-ratio &gt;0.90 for men and &gt;0.85 for women; Diabetes- Fasting Plasma Glucose (FPG) ≥ 126 mg/dl or on medication; SEM-Standard Error of Mean</i> |                      |                      |                      |                      |                      |                      |                      |                      |

STROBE 2007 (v4) Statement—Checklist of items that should be included in reports of *cross-sectional studies*

| Section/Topic             | Item # | Recommendation                                                                                                                                                                       | Reported on page # |
|---------------------------|--------|--------------------------------------------------------------------------------------------------------------------------------------------------------------------------------------|--------------------|
| Title and abstract        | 1      | (a) Indicate the study’s design with a commonly used term in the title or the abstract                                                                                               | 3                  |
|                           |        | (b) Provide in the abstract an informative and balanced summary of what was done and what was found                                                                                  | 3                  |
| <b>Introduction</b>       |        |                                                                                                                                                                                      |                    |
| Background/rationale      | 2      | Explain the scientific background and rationale for the investigation being reported                                                                                                 | 5                  |
| Objectives                | 3      | State specific objectives, including any prespecified hypotheses                                                                                                                     | 5                  |
| <b>Methods</b>            |        |                                                                                                                                                                                      |                    |
| Study design              | 4      | Present key elements of study design early in the paper                                                                                                                              | 5                  |
| Setting                   | 5      | Describe the setting, locations, and relevant dates, including periods of recruitment, exposure, follow-up, and data collection                                                      | 5,6                |
| Participants              | 6      | (a) Give the eligibility criteria, and the sources and methods of selection of participants                                                                                          | 6                  |
| Variables                 | 7      | Clearly define all outcomes, exposures, predictors, potential confounders, and effect modifiers. Give diagnostic criteria, if applicable                                             | 6                  |
| Data sources/ measurement | 8*     | For each variable of interest, give sources of data and details of methods of assessment (measurement). Describe comparability of assessment methods if there is more than one group | 6,7                |
| Bias                      | 9      | Describe any efforts to address potential sources of bias                                                                                                                            |                    |
| Study size                | 10     | Explain how the study size was arrived at                                                                                                                                            | 6                  |
| Quantitative variables    | 11     | Explain how quantitative variables were handled in the analyses. If applicable, describe which groupings were chosen and why                                                         | 7                  |
| Statistical methods       | 12     | (a) Describe all statistical methods, including those used to control for confounding                                                                                                | 7                  |
|                           |        | (b) Describe any methods used to examine subgroups and interactions                                                                                                                  | 7                  |
|                           |        | (c) Explain how missing data were addressed                                                                                                                                          | 5                  |
|                           |        | (d) If applicable, describe analytical methods taking account of sampling strategy                                                                                                   | 7                  |
|                           |        | (e) Describe any sensitivity analyses                                                                                                                                                | 5                  |
| <b>Results</b>            |        |                                                                                                                                                                                      |                    |

|                          |     |                                                                                                                                                                                                              |                |
|--------------------------|-----|--------------------------------------------------------------------------------------------------------------------------------------------------------------------------------------------------------------|----------------|
| Participants             | 13* | (a) Report numbers of individuals at each stage of study—eg numbers potentially eligible, examined for eligibility, confirmed eligible, included in the study, completing follow-up, and analysed            | 8              |
|                          |     | (b) Give reasons for non-participation at each stage                                                                                                                                                         | Not applicable |
|                          |     | (c) Consider use of a flow diagram                                                                                                                                                                           | Not applicable |
| Descriptive data         | 14* | (a) Give characteristics of study participants (eg demographic, clinical, social) and information on exposures and potential confounders                                                                     | 8              |
|                          |     | (b) Indicate number of participants with missing data for each variable of interest                                                                                                                          | 10,11          |
| Outcome data             | 15* | Report numbers of outcome events or summary measures                                                                                                                                                         | 10,11          |
| Main results             | 16  | (a) Give unadjusted estimates and, if applicable, confounder-adjusted estimates and their precision (eg, 95% confidence interval). Make clear which confounders were adjusted for and why they were included | 12             |
|                          |     | (b) Report category boundaries when continuous variables were categorized                                                                                                                                    | 7              |
|                          |     | (c) If relevant, consider translating estimates of relative risk into absolute risk for a meaningful time period                                                                                             | Not applicable |
| Other analyses           | 17  | Report other analyses done—eg analyses of subgroups and interactions, and sensitivity analyses                                                                                                               | 7              |
| <b>Discussion</b>        |     |                                                                                                                                                                                                              |                |
| Key results              | 18  | Summarise key results with reference to study objectives                                                                                                                                                     | 14             |
| Limitations              | 19  | Discuss limitations of the study, taking into account sources of potential bias or imprecision. Discuss both direction and magnitude of any potential bias                                                   | 15,16          |
| Interpretation           | 20  | Give a cautious overall interpretation of results considering objectives, limitations, multiplicity of analyses, results from similar studies, and other relevant evidence                                   | 14,15          |
| Generalisability         | 21  | Discuss the generalisability (external validity) of the study results                                                                                                                                        | 15             |
| <b>Other information</b> |     |                                                                                                                                                                                                              |                |
| Funding                  | 22  | Give the source of funding and the role of the funders for the present study and, if applicable, for the original study on which the present article is based                                                | 2              |

\*Give information separately for cases and controls in case-control studies and, if applicable, for exposed and unexposed groups in cohort and cross-sectional studies.

**Note:** An Explanation and Elaboration article discusses each checklist item and gives methodological background and published examples of transparent reporting. The STROBE checklist is best used in conjunction with this article (freely available on the Web sites of PLoS Medicine at <http://www.plosmedicine.org/>, Annals of Internal Medicine at <http://www.annals.org/>, and Epidemiology at <http://www.epidem.com/>). Information on the STROBE Initiative is available at [www.strobe-statement.org](http://www.strobe-statement.org).
